# Supplementary material for: Longitudinal association of dietary spermidine with hepatic function indexes and cardiometabolic traits in older adults with metabolic syndrome
Source: Research Square preprint supplement (doi:10.21203/rs.3.rs-7739697/v1), 2025-10-21

**SUPPLEMENTAL MATERIAL**

Longitudinal association of dietary spermidine with hepatic function indexes and cardiometabolic traits in older adults with metabolic syndrome

[Supplemental table 1. Mixed-effects models of hepatic and cardiometabolic indexes, anthropometric measurements and blood pressure normalized to baseline visit 2](#_Toc198579895)

[Supplemental table 2. Estimated effects of a 20-unit increase in spermidine levels 5](#_Toc198579896)

[Supplemental table 3. Estimated effects of a 20-unit increase in spermine levels 8](#_Toc198579897)

[Supplemental table 4. Estimated effects of a 20-unit increase in putrescine levels 11](#_Toc198579898)

[For treatment stratified analysis (Supplemental Figure 1 to 7): 14](#_Toc198579899)

[Supplemental figure 1. Stratified analysis effects of dietary SPD on FLI according to pharmacological treatment 15](#_Toc198579900)

[Supplemental figure 2. Stratified analysis effects of dietary SPD on HSI according to pharmacological treatment 16](#_Toc198579901)

[Supplemental figure 3. Stratified analysis effects of dietary SPD on AST according to pharmacological treatment 17](#_Toc198579902)

[Supplemental figure 4. Stratified analysis effects of dietary SPD on ALT according to pharmacological treatment 18](#_Toc198579903)

[Supplemental figure 5. Stratified analysis effects of dietary SPD on alkaline phosphatase according to pharmacological treatment 19](#_Toc198579904)

[Supplemental figure 6. Stratified analysis effects of dietary SPD on gamma glutamyl transferase according to pharmacological treatment 20](#_Toc198579905)

[Supplemental figure 7. Stratified analysis effects of dietary SPD on calcium according to pharmacological treatment 21](#_Toc198579906)

# **Supplemental table 1. Mixed-effects models of hepatic and cardiometabolic indexes, anthropometric measurements and blood pressure normalized to baseline visit**

| **Spermidine** | **beta (95% CI)** | **p-value** |  | **P-int. vis x cluster = <0.001** |
| --- | --- | --- | --- | --- |
| **∆ vis 6-0** |  |  |  | **P-int within vis0 = <0.001** |
| *Cluster 1* | 1.395 (0.186 to 2.604) | 0.024 |  | **P-int within vis6 = <0.001** |
| *Cluster 2* | 3.415 (2.214 to 4.616) | 0.000 |  | **P-int within vis12 = <0.001** |
| *Cluster 3* | 5.372 (3.692 to 7.052) | 0.000 |  |  |
| **∆ vis 12-0** |  |  |  |  |
| *Cluster 1* | 1.049 (-0.182 to 2.279) | 0.095 |  |  |
| *Cluster 2* | 2.465 (1.249 to 3.682) | 0.000 |  |  |
| *Cluster 3* | 6.213 (4.519 to 7.907) | 0.000 |  |  |
|  |  |  |  |  |
| **Waist-to-Hip Ratio** | **beta (95% CI)** | **p-value** |  | **P-int. vis x cluster = 0.174** |
| **∆ vis 6-0** |  |  |  | **P-int within vis0 = 0.066** |
| *Cluster 1* | -0.005 (-0.008 to -0.002) | 0.000 |  | **P-int within vis6 = 0.075** |
| *Cluster 2* | -0.005 (-0.008 to -0.002) | 0.000 |  | **P-int within vis12 = 0.662** |
| *Cluster 3* | -0.005 (-0.009 to -0.001) | 0.008 |  |  |
| **∆ vis 12-0** |  |  |  |  |
| *Cluster 1* | -0.003 (-0.006 to 0) | 0.031 |  |  |
| *Cluster 2* | -0.004 (-0.007 to -0.002) | 0.002 |  |  |
| *Cluster 3* | -0.007 (-0.011 to -0.003) | 0.000 |  |  |
|  |  |  |  |  |
| **Waist-to-Height Ratio** | **beta (95% CI)** | **p-value** |  | **P-int. vis x cluster = <0.001** |
| **∆ vis 6-0** |  |  |  | **P-int within vis0 = <0.001** |
| *Cluster 1* | -0.004 (-0.006 to -0.003) | 0.000 |  | **P-int within vis6 = 0.013** |
| *Cluster 2* | -0.007 (-0.009 to -0.005) | 0.000 |  | **P-int within vis12 = 0.328** |
| *Cluster 3* | -0.008 (-0.011 to -0.006) | 0.000 |  |  |
| **∆ vis 12-0** |  |  |  |  |
| *Cluster 1* | -0.004 (-0.006 to -0.003) | 0.000 |  |  |
| *Cluster 2* | -0.008 (-0.01 to -0.006) | 0.000 |  |  |
| *Cluster 3* | -0.012 (-0.014 to -0.009) | 0.000 |  |  |
|  |  |  |  |  |
| **Urine Albumin-Creatinine Ratio (UACR)** | **beta (95% CI)** | **p-value** |  | **P-int. vis x cluster = 0.746** |
| **∆ vis 6-0** |  |  |  | **P-int within vis0 = 0.987** |
| *Cluster 1* | 5.673 (1.075 to 10.27) | 0.016 |  | **P-int within vis6 = 0.385** |
| *Cluster 2* | 6.928 (2.369 to 11.488) | 0.003 |  | **P-int within vis12 = 0.410** |
| *Cluster 3* | 2.551 (-3.843 to 8.945) | 0.434 |  |  |
| **∆ vis 12-0** |  |  |  |  |
| *Cluster 1* | 2.868 (-1.806 to 7.543) | 0.229 |  |  |
| *Cluster 2* | 4.257 (-0.356 to 8.871) | 0.070 |  |  |
| *Cluster 3* | 0.032 (-6.409 to 6.474) | 0.992 |  |  |
|  |  |  |  |  |
| **Triglyceride-Glucose Index (TyG)** | **beta (95% CI)** | **p-value** |  | **P-int. vis x cluster = 0.598** |
| **∆ vis 6-0** |  |  |  | **P-int within vis0 = 0.193** |
| *Cluster 1* | -0.025 (-0.049 to -0.001) | 0.039 |  | **P-int within vis6 = 0.806** |
| *Cluster 2* | -0.053 (-0.077 to -0.029) | 0.000 |  | **P-int within vis12 = 0.848** |
| *Cluster 3* | -0.05 (-0.083 to -0.017) | 0.003 |  |  |
| **∆ vis 12-0** |  |  |  |  |
| *Cluster 1* | -0.028 (-0.052 to -0.003) | 0.026 |  |  |
| *Cluster 2* | -0.041 (-0.065 to -0.017) | 0.001 |  |  |
| *Cluster 3* | -0.047 (-0.08 to -0.013) | 0.006 |  |  |
|  |  |  |  |  |
| **Triglycerides/HDL Ratio** | **beta (95% CI)** | **p-value** |  | **P-int. vis x cluster = 0.919** |
| **∆ vis 6-0** |  |  |  | **P-int within vis0 = 0.437** |
| *Cluster 1* | -0.002 (-0.022 to 0.019) | 0.860 |  | **P-int within vis6 = 0.844** |
| *Cluster 2* | -0.013 (-0.033 to 0.007) | 0.215 |  | **P-int within vis12 = 0.751** |
| *Cluster 3* | -0.01 (-0.039 to 0.018) | 0.486 |  |  |
| **∆ vis 12-0** |  |  |  |  |
| *Cluster 1* | 0.003 (-0.017 to 0.024) | 0.754 |  |  |
| *Cluster 2* | -0.001 (-0.021 to 0.02) | 0.931 |  |  |
| *Cluster 3* | -0.004 (-0.033 to 0.024) | 0.767 |  |  |

Each model represents the results of a mixed-effects model analysing the change in markers related to anthropometry and blood pressure across time, normalized to baseline visit values. The model includes three hierarchical levels with random intercepts for node, cluster, and individual patients, accounting for intra-cluster correlation and individual variability. Models was adjusted for age (years), sex, baseline markers (continuous), intervention group, education level (higher degree, university, secondary school, primary school, illiterate), baseline physical activity (METs-min/week), smoking status (non-smoker, ex-smoker, smoker, other), total physical Mediterranean Diet adherence score-17p (continuous), total protein intake (g/d), carbohydrates (g/d), and total energy intake (kcal/d).

**Supplemental table 1. Continuation.**

| **Fibrosis-4 Index (FIB-4)** | **beta (95% CI)** | **p-value** |  | **P-int. vis x cluster = 0.955** |
| --- | --- | --- | --- | --- |
| **∆ vis 6-0** |  |  |  | **P-int within vis0 = 0.735** |
| *Cluster 1* | 0.012 (-0.018 to 0.041) | 0.433 |  | **P-int within vis6 = 0.562** |
| *Cluster 2* | 0.02 (-0.009 to 0.05) | 0.175 |  | **P-int within vis12 = 0.815** |
| *Cluster 3* | 0.011 (-0.03 to 0.052) | 0.596 |  |  |
| **∆ vis 12-0** |  |  |  |  |
| *Cluster 1* | 0.025 (-0.005 to 0.055) | 0.107 |  |  |
| *Cluster 2* | 0.021 (-0.009 to 0.051) | 0.166 |  |  |
| *Cluster 3* | 0.022 (-0.019 to 0.064) | 0.292 |  |  |
|  |  |  |  |  |
| **Fibrosis-5 Index (FIB-5)** | **beta (95% CI)** | **p-value** |  | **P-int. vis x cluster = 0.340** |
| **∆ vis 6-0** |  |  |  | **P-int within vis0 = 0.403** |
| *Cluster 1* | 0.14 (-0.038 to 0.318) | 0.122 |  | **P-int within vis6 = 0.317** |
| *Cluster 2* | 0.197 (0.021 to 0.374) | 0.028 |  | **P-int within vis12 = 0.373** |
| *Cluster 3* | -0.074 (-0.321 to 0.173) | 0.556 |  |  |
| **∆ vis 12-0** |  |  |  |  |
| *Cluster 1* | 0.239 (0.058 to 0.42) | 0.010 |  |  |
| *Cluster 2* | 0.257 (0.078 to 0.435) | 0.005 |  |  |
| *Cluster 3* | -0.019 (-0.268 to 0.23) | 0.879 |  |  |
|  |  |  |  |  |
| **APRI (AST to Platelet Ratio Index)** | **beta (95% CI)** | **p-value** |  | **P-int. vis x cluster = 0.523** |
| **∆ vis 6-0** |  |  |  | **P-int within vis0 = 0.415** |
| *Cluster 1* | -0.001 (-0.008 to 0.005) | 0.660 |  | **P-int within vis6 = 0.629** |
| *Cluster 2* | -0.008 (-0.015 to -0.002) | 0.014 |  | **P-int within vis12 = 0.357** |
| *Cluster 3* | -0.007 (-0.016 to 0.002) | 0.137 |  |  |
| **∆ vis 12-0** |  |  |  |  |
| *Cluster 1* | -0.002 (-0.009 to 0.004) | 0.509 |  |  |
| *Cluster 2* | -0.01 (-0.016 to -0.003) | 0.003 |  |  |
| *Cluster 3* | -0.006 (-0.016 to 0.003) | 0.166 |  |  |
|  |  |  |  |  |
| **Fatty Liver Index (FLI)** | **beta (95% CI)** | **p-value** |  | **P-int. vis x cluster = <0.001** |
| **∆ vis 6-0** |  |  |  | **P-int within vis0 = <0.001** |
| *Cluster 1* | -1.529 (-2.269 to -0.789) | 0.000 |  | **P-int within vis6 = 0.318** |
| *Cluster 2* | -3.217 (-3.954 to -2.48) | 0.000 |  | **P-int within vis12 = 0.540** |
| *Cluster 3* | -3.585 (-4.613 to -2.557) | 0.000 |  |  |
| **∆ vis 12-0** |  |  |  |  |
| *Cluster 1* | -1.845 (-2.6 to -1.09) | 0.000 |  |  |
| *Cluster 2* | -3.399 (-4.147 to -2.651) | 0.000 |  |  |
| *Cluster 3* | -4.501 (-5.539 to -3.464) | 0.000 |  |  |
|  |  |  |  |  |
| **Hepatic Steatosis Index (HSI)** | **beta (95% CI)** | **p-value** |  | **P-int. vis x cluster = <0.001** |
| **∆ vis 6-0** |  |  |  | **P-int within vis0 = 0.001** |
| *Cluster 1* | -0.411 (-0.6 to -0.221) | 0.000 |  | **P-int within vis6 = 0.798** |
| *Cluster 2* | -0.69 (-0.878 to -0.501) | 0.000 |  | **P-int within vis12 = 0.143** |
| *Cluster 3* | -0.799 (-1.062 to -0.536) | 0.000 |  |  |
| **∆ vis 12-0** |  |  |  |  |
| *Cluster 1* | -0.381 (-0.574 to -0.188) | 0.000 |  |  |
| *Cluster 2* | -0.858 (-1.049 to -0.667) | 0.000 |  |  |
| *Cluster 3* | -1.073 (-1.339 to -0.808) | 0.000 |  |  |
|  |  |  |  |  |
| **EPI Creatinine Clearance Index** | **beta (95% CI)** | **p-value** |  | **P-int. vis x cluster = 0.591** |
| **∆ vis 6-0** |  |  |  | **P-int within vis0 = 0.407** |
| *Cluster 1* | -0.088 (-0.775 to 0.599) | 0.801 |  | **P-int within vis6 = 0.585** |
| *Cluster 2* | -0.01 (-0.693 to 0.672) | 0.977 |  | **P-int within vis12 = 0.652** |
| *Cluster 3* | -0.327 (-1.281 to 0.628) | 0.503 |  |  |
| **∆ vis 12-0** |  |  |  |  |
| *Cluster 1* | -0.136 (-0.835 to 0.564) | 0.704 |  |  |
| *Cluster 2* | -0.764 (-1.455 to -0.072) | 0.030 |  |  |
| *Cluster 3* | -1 (-1.963 to -0.038) | 0.042 |  |  |

Each model represents the results of a mixed-effects model analysing the change in markers related to anthropometry and blood pressure across time, normalized to baseline visit values. The model includes three hierarchical levels with random intercepts for node, cluster, and individual patients, accounting for intra-cluster correlation and individual variability. Models was adjusted for age (years), sex, baseline markers (continuous), intervention group, education level (higher degree, university, secondary school, primary school, illiterate), baseline physical activity (METs-min/week), smoking status (non-smoker, ex-smoker, smoker, other), total physical Mediterranean Diet adherence score-17p (continuous), total protein intake (g/d), carbohydrates (g/d), and total energy intake (kcal/d).

**Supplemental table 1. Continuation.**

| **BMI (kg/m²)** | **beta (95% CI)** | **p-value** |  | **P-int. vis x cluster = <0.001** |
| --- | --- | --- | --- | --- |
| **∆ vis 6-0** |  |  |  | **P-int within vis0 = <0.001** |
| *Cluster 1* | -0.173 (-0.254 to -0.092) | 0.000 |  | **P-int within vis6 = 0.137** |
| *Cluster 2* | -0.389 (-0.47 to -0.308) | 0.000 |  | **P-int within vis12 = 0.337** |
| *Cluster 3* | -0.53 (-0.643 to -0.418) | 0.000 |  |  |
| **∆ vis 12-0** |  |  |  |  |
| *Cluster 1* | -0.187 (-0.269 to -0.104) | 0.000 |  |  |
| *Cluster 2* | -0.472 (-0.554 to -0.39) | 0.000 |  |  |
| *Cluster 3* | -0.665 (-0.778 to -0.551) | 0.000 |  |  |
|  |  |  |  |  |
| **Waist (cm)** | **beta (95% CI)** | **p-value** |  | **P-int. vis x cluster = <0.001** |
| **∆ vis 6-0** |  |  |  | **P-int within vis0 = <0.001** |
| *Cluster 1* | -0.728 (-1.021 to -0.435) | 0.000 |  | **P-int within vis6 = 0.024** |
| *Cluster 2* | -1.154 (-1.446 to -0.863) | 0.000 |  | **P-int within vis12 = 0.313** |
| *Cluster 3* | -1.37 (-1.777 to -0.963) | 0.000 |  |  |
| **∆ vis 12-0** |  |  |  |  |
| *Cluster 1* | -0.758 (-1.056 to -0.459) | 0.000 |  |  |
| *Cluster 2* | -1.314 (-1.61 to -1.018) | 0.000 |  |  |
| *Cluster 3* | -1.929 (-2.339 to -1.518) | 0.000 |  |  |
|  |  |  |  |  |
| **Hip (cm)** | **beta (95% CI)** | **p-value** |  | **P-int. vis x cluster = 0.001** |
| **∆ vis 6-0** |  |  |  | **P-int within vis0 = 0.001** |
| *Cluster 1* | -0.186 (-0.445 to 0.072) | 0.157 |  | **P-int within vis6 = 0.981** |
| *Cluster 2* | -0.662 (-0.919 to -0.405) | 0.000 |  | **P-int within vis12 = 0.529** |
| *Cluster 3* | -0.874 (-1.233 to -0.515) | 0.000 |  |  |
| **∆ vis 12-0** |  |  |  |  |
| *Cluster 1* | -0.465 (-0.728 to -0.202) | 0.001 |  |  |
| *Cluster 2* | -0.912 (-1.173 to -0.652) | 0.000 |  |  |
| *Cluster 3* | -1.292 (-1.654 to -0.93) | 0.000 |  |  |
|  |  |  |  |  |
| **DBP (mmHg)** | **beta (95% CI)** | **p-value** |  | **P-int. vis x cluster = 0.478** |
| **∆ vis 6-0** |  |  |  | **P-int within vis0 = 0.492** |
| *Cluster 1* | -1.036 (-1.545 to -0.526) | 0.000 |  | **P-int within vis6 = 0.133** |
| *Cluster 2* | -0.868 (-1.374 to -0.362) | 0.001 |  | **P-int within vis12 = 0.456** |
| *Cluster 3* | -1.273 (-1.981 to -0.565) | 0.000 |  |  |
| **∆ vis 12-0** |  |  |  |  |
| *Cluster 1* | -1.507 (-2.026 to -0.989) | 0.000 |  |  |
| *Cluster 2* | -1.502 (-2.014 to -0.989) | 0.000 |  |  |
| *Cluster 3* | -1.438 (-2.151 to -0.724) | 0.000 |  |  |
|  |  |  |  |  |
| **SBP (mmHg)** | **beta (95% CI)** | **p-value** |  | **P-int. vis x cluster = 0.327** |
| **∆ vis 6-0** |  |  |  | **P-int within vis0 = 0.196** |
| *Cluster 1* | -1.214 (-2.151 to -0.276) | 0.011 |  | **P-int within vis6 = 0.093** |
| *Cluster 2* | -0.913 (-1.844 to 0.018) | 0.055 |  | **P-int within vis12 = 0.699** |
| *Cluster 3* | -1.703 (-3.006 to -0.4) | 0.010 |  |  |
| **∆ vis 12-0** |  |  |  |  |
| *Cluster 1* | -1.728 (-2.682 to -0.774) | 0.000 |  |  |
| *Cluster 2* | -2.242 (-3.185 to -1.3) | 0.000 |  |  |
| *Cluster 3* | -2.185 (-3.498 to -0.871) | 0.001 |  |  |

Each model represents the results of a mixed-effects model analysing the change in markers related to anthropometry and blood pressure across time, normalized to baseline visit values. The model includes three hierarchical levels with random intercepts for node, cluster, and individual patients, accounting for intra-cluster correlation and individual variability. Models was adjusted for age (years), sex, baseline markers (continuous), intervention group, education level (higher degree, university, secondary school, primary school, illiterate), baseline physical activity (METs-min/week), smoking status (non-smoker, ex-smoker, smoker, other), total physical Mediterranean Diet adherence score-17p (continuous), total protein intake (g/d), carbohydrates (g/d), and total energy intake (kcal/d).

# **Supplemental table 2. Estimated effects of a 20-unit increase in spermidine levels**

|  | **Spermidine** | | | |
| --- | --- | --- | --- | --- |
|  | **v66** | | **v12** | |
|  | **beta (95% CI)1** | **p** | **beta (95% CI)1** | **p** |
| **Waist-to-Hip Ratio** |  |  |  |  |
| crude | -0.0011 (-0.0023 to 0.0000) | 0.049 | -0.0016 (-0.0027 to -0.0004) | 0.007 |
| Mod 1 | -0.0014 (-0.0024 to -0.0003) | 0.014 | -0.0016 (-0.0027 to -0.0005) | 0.004 |
| Mod 2 | -0.0012 (-0.0023 to -0.0001) | 0.033 | -0.0014 (-0.0025 to -0.0003) | 0.010 |
| Mod 3 | -0.0012 (-0.0023 to -0.0001) | 0.030 | -0.0015 (-0.0026 to -0.0004) | 0.009 |
| **Waist-to-Height Ratio** |  |  |  |  |
| crude | -0.0011 (-0.0019 to -0.0004) | 0.004 | -0.0016 (-0.0024 to -0.0008) | <0.001 |
| Mod 1 | -0.0013 (-0.0020 to -0.0005) | 0.001 | -0.0017 (-0.0024 to -0.0009) | <0.001 |
| Mod 2 | -0.0010 (-0.0017 to -0.0003) | 0.007 | -0.0014 (-0.0021 to -0.0007) | <0.001 |
| Mod 3 | -0.0009 (-0.0016 to -0.0002) | 0.009 | -0.0014 (-0.0021 to -0.0007) | <0.001 |
| **Urine Albumin-Creatinine Ratio (UACR)** |  |  |  |  |
| crude | -0.54 (-2.38 to 1.30) | 0.563 | -0.34 (-2.20 to 1.52) | 0.717 |
| Mod 1 | -0.35 (-2.10 to 1.40) | 0.693 | 0.13 (-1.64 to 1.90) | 0.883 |
| Mod 2 | -0.377 (-2.131 to 1.377) | 0.673 | 0.093 (-1.680 to 1.866) | 0.918 |
| Mod 3 | -0.447 (-2.208 to 1.314) | 0.619 | 0.043 (-1.738 to 1.823) | 0.963 |
| **Triglyceride-Glucose Index (TyG)** |  |  |  |  |
| crude | -0.0063 (-0.0159 to 0.0033) | 0.200 | -0.0031 (-0.0128 to 0.0066) | 0.530 |
| Mod 1 | -0.0091 (-0.0183 to 0.0001) | 0.053 | -0.0050 (-0.0143 to 0.0043) | 0.289 |
| Mod 2 | -0.0067 (-0.0158 to 0.0025) | 0.152 | -0.0030 (-0.0123 to 0.0062) | 0.517 |
| Mod 3 | -0.0064 (-0.0156 to 0.0027) | 0.168 | -0.0028 (-0.0121 to 0.0064) | 0.550 |
| **Triglycerides/HDL Ratio** |  |  |  |  |
| crude | -0.0052 (-0.0134 to 0.0030) | 0.217 | -0.0020 (-0.0103 to 0.0064) | 0.644 |
| Mod 1 | -0.0052 (-0.0131 to 0.0026) | 0.192 | -0.0020 (-0.0099 to 0.0059) | 0.622 |
| Mod 2 | -0.0040 (-0.0118 to 0.0038) | 0.312 | -0.0010 (-0.0089 to 0.0069) | 0.809 |
| Mod 3 | -0.0040 (-0.0118 to 0.0039) | 0.320 | -0.0007 (-0.0086 to 0.0073) | 0.869 |
| **Fibrosis-4 Index (FIB-4)** |  |  |  |  |
| crude | 0.0035 (-0.0084 to 0.0153) | 0.566 | 0.0017 (-0.0102 to 0.0137) | 0.776 |
| Mod 1 | 0.0034 (-0.0079 to 0.0147) | 0.556 | 0.0041 (-0.0074 to 0.0155) | 0.487 |
| Mod 2 | 0.0023 (-0.0090 to 0.0136) | 0.690 | 0.0033 (-0.0082 to 0.0147) | 0.574 |
| Mod 3 | 0.0014 (-0.0099 to 0.0128) | 0.805 | 0.0027 (-0.0088 to 0.0142) | 0.644 |
| **Fibrosis-5 Index (FIB-5)** |  |  |  |  |
| crude | -0.038 (-0.109 to 0.033) | 0.299 | -0.106 (-0.178 to -0.034) | 0.004 |
| Mod 1 | -0.0235 (-0.0910 to 0.0441) | 0.495 | -0.0733 (-0.1416 to -0.0049) | 0.036 |
| Mod 2 | -0.0270 (-0.0946 to 0.0407) | 0.435 | -0.0761 (-0.1446 to -0.0076) | 0.029 |
| Mod 3 | -0.0203 (-0.0881 to 0.0476) | 0.558 | -0.0679 (-0.1365 to 0.0008) | 0.053 |
| **APRI (AST to Platelet Ratio Index)** |  |  |  |  |
| crude | -0.0001 (-0.0028 to 0.0025) | 0.910 | -0.0006 (-0.0032 to 0.0020) | 0.654 |
| Mod 1 | -0.0005 (-0.0030 to 0.0019) | 0.666 | -0.0005 (-0.0031 to 0.0020) | 0.674 |
| Mod 2 | -0.0005 (-0.0030 to 0.0020) | 0.672 | -0.0005 (-0.0030 to 0.0020) | 0.693 |
| Mod 3 | -0.0008 (-0.0034 to 0.0017) | 0.505 | -0.0008 (-0.0033 to 0.0017) | 0.544 |
| **Fatty Liver Index (FLI)** |  |  |  |  |
| crude | -0.370 (-0.677 to -0.062) | 0.018 | -0.453 (-0.764 to -0.142) | 0.004 |
| Mod 1 | -0.496 (-0.792 to -0.200) | 0.001 | -0.577 (-0.876 to -0.278) | <0.001 |
| Mod 2 | -0.357 (-0.643 to -0.071) | 0.014 | -0.459 (-0.749 to -0.170) | 0.002 |
| Mod 3 | -0.345 (-0.632 to -0.058) | 0.018 | -0.466 (-0.756 to -0.176) | 0.002 |
| **Hepatic Steatosis Index (HSI)** |  |  |  |  |
| crude | -0.057 (-0.135 to 0.021) | 0.151 | -0.118 (-0.196 to -0.039) | 0.003 |
| Mod 1 | -0.0681 (-0.1423 to 0.0061) | 0.072 | -0.1323 (-0.2074 to -0.0572) | 0.001 |
| Mod 2 | -0.040 (-0.113 to 0.033) | 0.280 | -0.108 (-0.181 to -0.034) | 0.004 |
| Mod 3 | -0.039 (-0.112 to 0.034) | 0.291 | -0.111 (-0.185 to -0.038) | 0.003 |
| **EPI Creatinine Clearance Index** |  |  |  |  |
| crude | -0.143 (-0.419 to 0.133) | 0.309 | -0.328 (-0.607 to -0.050) | 0.021 |
| Mod 1 | -0.036 (-0.299 to 0.226) | 0.787 | -0.143 (-0.408 to 0.123) | 0.292 |
| Mod 2 | -0.051 (-0.314 to 0.211) | 0.701 | -0.149 (-0.415 to 0.117) | 0.271 |
| Mod 3 | -0.023 (-0.287 to 0.240) | 0.862 | -0.133 (-0.399 to 0.134) | 0.329 |

1 Symbols in beta and 95% CI: * p<0.05, ** p<0.01, ***p<0.001

Model 1 adjusted for baseline age (years), sex, baseline value, and intervention group

Model 2 additional adjusted for education level (higher degree, university, secondary school, primary school, illiterate), baseline physical activity (METs-min/week), smoking status (non-smoker, ex-smoker, smoker, other), Mediterranean Diet adherence score-17p (continuous), total protein intake (g/d), carbohydrates (g/d), and total energy intake (kcal/d)

Model 3 additional adjusted for total vegetable intake (g/d), fruit intake (g/d), legume intake (g/d), fish intake (g/d), and nut intake (g/d)

**Supplemental table 2. Continuation.**

|  | **Spermidine** | | | |
| --- | --- | --- | --- | --- |
|  | **v66** | | **v12** | |
|  | **beta (95% CI)1** | **p** | **beta (95% CI)1** | **p** |
| **BMI (kg/m²)** |  |  |  |  |
| crude | -0.050 (-0.085 to -0.015) | 0.005 | -0.067 (-0.102 to -0.032) | <0.001 |
| Mod 1 | -0.064 (-0.097 to -0.031) | <0.001 | -0.076 (-0.110 to -0.043) | <0.001 |
| Mod 2 | -0.045 (-0.076 to -0.013) | 0.005 | -0.061 (-0.092 to -0.029) | <0.001 |
| Mod 3 | -0.0408 (-0.0723 to -0.0093) | 0.011 | -0.0600 (-0.0919 to -0.0282) | <0.001 |
| **Waist (cm)** |  |  |  |  |
| crude | -0.194 (-0.316 to -0.071) | 0.002 | -0.267 (-0.391 to -0.143) | <0.001 |
| Mod 1 | -0.221 (-0.338 to -0.103) | <0.001 | -0.281 (-0.400 to -0.162) | <0.001 |
| Mod 2 | -0.169 (-0.282 to -0.056) | 0.003 | -0.239 (-0.353 to -0.124) | <0.001 |
| Mod 3 | -0.166 (-0.279 to -0.052) | 0.004 | -0.243 (-0.358 to -0.129) | <0.001 |
| **Hip (cm)** |  |  |  |  |
| crude | -0.0733 (-0.1786 to 0.0320) | 0.173 | -0.1008 (-0.2073 to 0.0057) | 0.064 |
| Mod 1 | -0.079 (-0.180 to 0.022) | 0.125 | -0.116 (-0.218 to -0.014) | 0.026 |
| Mod 2 | -0.0482 (-0.1477 to 0.0514) | 0.343 | -0.0927 (-0.1934 to 0.0080) | 0.071 |
| Mod 3 | -0.0418 (-0.1416 to 0.0580) | 0.411 | -0.0943 (-0.1953 to 0.0067) | 0.067 |
| **DBP - Diastolic Blood Pressure (mmHg)** |  |  |  |  |
| crude | -0.094 (-0.297 to 0.110) | 0.367 | 0.030 (-0.176 to 0.235) | 0.779 |
| Mod 1 | -0.117 (-0.312 to 0.077) | 0.238 | 0.012 (-0.185 to 0.209) | 0.904 |
| Mod 2 | -0.097 (-0.291 to 0.098) | 0.329 | 0.030 (-0.167 to 0.226) | 0.768 |
| Mod 3 | -0.073 (-0.268 to 0.122) | 0.463 | 0.045 (-0.152 to 0.243) | 0.652 |
| **SBP - Systolic Blood Pressure (mmHg)** |  |  |  |  |
| crude | -0.089 (-0.464 to 0.285) | 0.640 | -0.084 (-0.463 to 0.295) | 0.664 |
| Mod 1 | -0.122 (-0.480 to 0.236) | 0.504 | -0.178 (-0.540 to 0.184) | 0.335 |
| Mod 2 | -0.087 (-0.445 to 0.271) | 0.634 | -0.148 (-0.510 to 0.214) | 0.423 |
| Mod 3 | -0.034 (-0.393 to 0.324) | 0.851 | -0.105 (-0.468 to 0.258) | 0.570 |
| **Glucose (mg/dL)** |  |  |  |  |
| crude | -0.29 (-0.78 to 0.20) | 0.241 | -0.25 (-0.74 to 0.25) | 0.331 |
| Mod 1 | -0.397 (-0.862 to 0.068) | 0.094 | -0.352 (-0.823 to 0.119) | 0.143 |
| Mod 2 | -0.34 (-0.80 to 0.13) | 0.153 | -0.31 (-0.78 to 0.16) | 0.199 |
| Mod 3 | -0.33 (-0.80 to 0.13) | 0.161 | -0.32 (-0.79 to 0.15) | 0.188 |
| **AST - Aspartate Aminotransferase (U/L)** |  |  |  |  |
| crude | -0.060 (-0.260 to 0.140) | 0.557 | -0.091 (-0.293 to 0.111) | 0.380 |
| Mod 1 | -0.112 (-0.302 to 0.078) | 0.248 | -0.101 (-0.293 to 0.091) | 0.303 |
| Mod 2 | -0.102 (-0.292 to 0.087) | 0.290 | -0.091 (-0.283 to 0.101) | 0.353 |
| Mod 3 | -0.119 (-0.310 to 0.071) | 0.220 | -0.106 (-0.299 to 0.087) | 0.281 |
| **ALT - Alanine Aminotransferase (U/L)** |  |  |  |  |
| crude | -0.1532 (-0.4301 to 0.1237) | 0.278 | -0.1730 (-0.4531 to 0.1072) | 0.226 |
| Mod 1 | -0.232 (-0.494 to 0.031) | 0.083 | -0.246 (-0.511 to 0.020) | 0.070 |
| Mod 2 | -0.1853 (-0.4472 to 0.0767) | 0.166 | -0.2034 (-0.4684 to 0.0616) | 0.133 |
| Mod 3 | -0.213 (-0.476 to 0.050) | 0.112 | -0.234 (-0.500 to 0.032) | 0.085 |
| **Alkaline Phosphatase (U/L)** |  |  |  |  |
| crude | 0.76 (0.18 to 1.34) | 0.010 | 2.04 (1.46 to 2.63) | <0.001 |
| Mod 1 | 0.74 (0.20 to 1.28) | 0.007 | 1.82 (1.27 to 2.37) | <0.001 |
| Mod 2 | 0.77 (0.23 to 1.31) | 0.006 | 1.84 (1.29 to 2.39) | <0.001 |
| Mod 3 | 0.77 (0.23 to 1.31) | 0.006 | 1.81 (1.26 to 2.36) | <0.001 |
| **Gamma GT (U/L)** |  |  |  |  |
| crude | 0.228 (-0.409 to 0.864) | 0.483 | 0.100 (-0.544 to 0.743) | 0.762 |
| Mod 1 | 0.153 (-0.452 to 0.757) | 0.620 | 0.028 (-0.583 to 0.639) | 0.929 |
| Mod 2 | 0.185 (-0.419 to 0.789) | 0.549 | 0.060 (-0.551 to 0.671) | 0.847 |
| Mod 3 | 0.184 (-0.422 to 0.791) | 0.551 | 0.041 (-0.573 to 0.654) | 0.897 |
| **Calcium (mg/dL)** |  |  |  |  |
| crude | -0.0096 (-0.0206 to 0.0015) | 0.090 | -0.0106 (-0.0217 to 0.0006) | 0.063 |
| Mod 1 | -0.0060 (-0.0166 to 0.0045) | 0.263 | -0.0106 (-0.0213 to 0.0001) | 0.052 |
| Mod 2 | -0.0071 (-0.0177 to 0.0035) | 0.189 | -0.0115 (-0.0222 to -0.0008) | 0.036 |
| Mod 3 | -0.0076 (-0.0183 to 0.0030) | 0.158 | -0.0118 (-0.0225 to -0.0010) | 0.032 |

1 Symbols in beta and 95% CI: * p<0.05, ** p<0.01, ***p<0.001

Model 1 adjusted for baseline age (years), sex, baseline value, and intervention group

Model 2 additional adjusted for education level (higher degree, university, secondary school, primary school, illiterate), baseline physical activity (METs-min/week), smoking status (non-smoker, ex-smoker, smoker, other), Mediterranean Diet adherence score-17p (continuous), total protein intake (g/d), carbohydrates (g/d), and total energy intake (kcal/d)

Model 3 additional adjusted for total vegetable intake (g/d), fruit intake (g/d), legume intake (g/d), fish intake (g/d), and nut intake (g/d)

**Supplemental table 2. Continuation.**

|  | **Spermidine** | | | |
| --- | --- | --- | --- | --- |
|  | **v66** | | **v12** | |
|  | **beta (95% CI)1** | **p** | **beta (95% CI)1** | **p** |
| **Albumin (g/dL)** |  |  |  |  |
| crude | 0.0028 (-0.0055 to 0.0110) | 0.511 | -0.0041 (-0.0125 to 0.0042) | 0.330 |
| Mod 1 | 0.0014 (-0.0064 to 0.0093) | 0.724 | -0.0058 (-0.0137 to 0.0022) | 0.156 |
| Mod 2 | 0.0006 (-0.0072 to 0.0085) | 0.875 | -0.0065 (-0.0145 to 0.0015) | 0.109 |
| Mod 3 | 0.0011 (-0.0068 to 0.0090) | 0.782 | -0.0059 (-0.0139 to 0.0021) | 0.150 |
| **Total Cholesterol (mg/dL)** |  |  |  |  |
| crude | 0.33 (-0.44 to 1.10) | 0.395 | 1.36 (0.59 to 2.14) | 0.001 |
| Mod 1 | 0.28 (-0.45 to 1.01) | 0.452 | 1.30 (0.56 to 2.04) | 0.001 |
| Mod 2 | 0.32 (-0.42 to 1.05) | 0.397 | 1.34 (0.60 to 2.08) | <0.001 |
| Mod 3 | 0.33 (-0.41 to 1.06) | 0.379 | 1.36 (0.62 to 2.11) | <0.001 |
| **HDL Cholesterol (mg/dL)** |  |  |  |  |
| crude | -0.0093 (-0.2072 to 0.1886) | 0.927 | -0.0131 (-0.2132 to 0.1871) | 0.898 |
| Mod 1 | 0.055 (-0.134 to 0.243) | 0.569 | 0.016 (-0.175 to 0.206) | 0.872 |
| Mod 2 | 0.0275 (-0.1612 to 0.2161) | 0.775 | -0.0051 (-0.1959 to 0.1857) | 0.959 |
| Mod 3 | 0.0266 (-0.1627 to 0.2158) | 0.783 | 0.0005 (-0.1909 to 0.1920) | 0.996 |
| **LDL (calculated if triglycerides ≤300) (mg/dL)** |  |  |  |  |
| crude | 0.39 (-0.29 to 1.07) | 0.259 | 1.33 (0.64 to 2.02) | <0.001 |
| Mod 1 | 0.34 (-0.31 to 0.99) | 0.310 | 1.27 (0.62 to 1.93) | <0.001 |
| Mod 2 | 0.36 (-0.29 to 1.01) | 0.283 | 1.30 (0.64 to 1.96) | <0.001 |
| Mod 3 | 0.37 (-0.29 to 1.02) | 0.271 | 1.30 (0.64 to 1.96) | <0.001 |
| **Triglycerides (mg/dL)** |  |  |  |  |
| crude | -0.18 (-1.35 to 0.98) | 0.761 | 0.31 (-0.87 to 1.48) | 0.612 |
| Mod 1 | -0.51 (-1.62 to 0.60) | 0.366 | 0.10 (-1.02 to 1.23) | 0.856 |
| Mod 2 | -0.242 (-1.347 to 0.863) | 0.668 | 0.327 (-0.790 to 1.445) | 0.566 |
| Mod 3 | -0.230 (-1.339 to 0.879) | 0.684 | 0.358 (-0.763 to 1.479) | 0.531 |
| **HbA1c (%)** |  |  |  |  |
| crude | -0.0132 (-0.0260 to -0.0004) | 0.043 | -0.0108 (-0.0237 to 0.0021) | 0.101 |
| Mod 1 | -0.0199 (-0.0320 to -0.0077) | 0.001 | -0.0147 (-0.0270 to -0.0025) | 0.019 |
| Mod 2 | -0.0175 (-0.0296 to -0.0054) | 0.005 | -0.0128 (-0.0251 to -0.0006) | 0.040 |
| Mod 3 | -0.0176 (-0.0298 to -0.0055) | 0.004 | -0.0135 (-0.0258 to -0.0013) | 0.031 |
| **IFCC (mmol/mol)** |  |  |  |  |
| crude | -0.057 (-0.182 to 0.068) | 0.373 | -0.088 (-0.214 to 0.038) | 0.172 |
| Mod 1 | -0.1373 (-0.2564 to -0.0183) | 0.024 | -0.1475 (-0.2680 to -0.0270) | 0.016 |
| Mod 2 | -0.1128 (-0.2314 to 0.0058) | 0.062 | -0.1268 (-0.2467 to -0.0068) | 0.038 |
| Mod 3 | -0.1169 (-0.2359 to 0.0020) | 0.054 | -0.1359 (-0.2562 to -0.0155) | 0.027 |

1 Symbols in beta and 95% CI: * p<0.05, ** p<0.01, ***p<0.001

Model 1 adjusted for baseline age (years), sex, baseline value, and intervention group

Model 2 additional adjusted for education level (higher degree, university, secondary school, primary school, illiterate), baseline physical activity (METs-min/week), smoking status (non-smoker, ex-smoker, smoker, other), Mediterranean Diet adherence score-17p (continuous), total protein intake (g/d), carbohydrates (g/d), and total energy intake (kcal/d)

Model 3 additional adjusted for total vegetable intake (g/d), fruit intake (g/d), legume intake (g/d), fish intake (g/d), and nut intake (g/d)

# **Supplemental table 3. Estimated effects of a 20-unit increase in spermine levels**

|  | **Spermine** | | | |
| --- | --- | --- | --- | --- |
|  | **v66** | | **v12** | |
|  | **beta (95% CI)1** | **p** | **beta (95% CI)1** | **p** |
| **Waist-to-Hip Ratio** |  |  |  |  |
| crude | -0.0005 (-0.0028 to 0.0017) | 0.635 | -0.0018 (-0.0041 to 0.0005) | 0.120 |
| Mod 1 | -0.0009 (-0.0030 to 0.0012) | 0.410 | -0.0021 (-0.0043 to 0.0000) | 0.054 |
| Mod 2 | -0.0003 (-0.0025 to 0.0018) | 0.753 | -0.0017 (-0.0039 to 0.0004) | 0.114 |
| Mod 3 | -0.0002 (-0.0023 to 0.0019) | 0.849 | -0.0016 (-0.0038 to 0.0005) | 0.142 |
| **Waist-to-Height Ratio** |  |  |  |  |
| crude | -0.0018 (-0.0032 to -0.0003) | 0.020 | -0.0025 (-0.0040 to -0.0010) | 0.001 |
| Mod 1 | -0.0018 (-0.0032 to -0.0003) | 0.015 | -0.0023 (-0.0038 to -0.0009) | 0.001 |
| Mod 2 | -0.0010 (-0.0023 to 0.0004) | 0.168 | -0.0018 (-0.0031 to -0.0004) | 0.013 |
| Mod 3 | -0.0007 (-0.0021 to 0.0006) | 0.298 | -0.0016 (-0.0030 to -0.0002) | 0.026 |
| **Urine Albumin-Creatinine Ratio (UACR)** |  |  |  |  |
| crude | -0.21 (-3.82 to 3.40) | 0.909 | -1.51 (-5.16 to 2.15) | 0.419 |
| Mod 1 | 0.64 (-2.81 to 4.08) | 0.716 | -1.00 (-4.48 to 2.48) | 0.572 |
| Mod 2 | 0.577 (-2.872 to 4.026) | 0.743 | -1.049 (-4.531 to 2.433) | 0.555 |
| Mod 3 | 0.437 (-3.026 to 3.899) | 0.805 | -1.075 (-4.566 to 2.417) | 0.546 |
| **Triglyceride-Glucose Index (TyG)** |  |  |  |  |
| crude | -0.0135 (-0.0323 to 0.0054) | 0.161 | -0.0150 (-0.0341 to 0.0041) | 0.123 |
| Mod 1 | -0.0143 (-0.0324 to 0.0038) | 0.122 | -0.0115 (-0.0298 to 0.0068) | 0.219 |
| Mod 2 | -0.0089 (-0.0268 to 0.0090) | 0.331 | -0.0074 (-0.0255 to 0.0107) | 0.423 |
| Mod 3 | -0.0079 (-0.0259 to 0.0100) | 0.387 | -0.0066 (-0.0247 to 0.0115) | 0.475 |
| **Triglycerides/HDL Ratio** |  |  |  |  |
| crude | -0.0102 (-0.0263 to 0.0059) | 0.216 | -0.0134 (-0.0298 to 0.0029) | 0.108 |
| Mod 1 | -0.0074 (-0.0228 to 0.0080) | 0.346 | -0.0096 (-0.0252 to 0.0060) | 0.226 |
| Mod 2 | -0.0046 (-0.0199 to 0.0108) | 0.560 | -0.0072 (-0.0227 to 0.0083) | 0.361 |
| Mod 3 | -0.0046 (-0.0200 to 0.0108) | 0.558 | -0.0070 (-0.0225 to 0.0086) | 0.379 |
| **Fibrosis-4 Index (FIB-4)** |  |  |  |  |
| crude | 0.0061 (-0.0171 to 0.0293) | 0.606 | 0.0003 (-0.0232 to 0.0238) | 0.981 |
| Mod 1 | 0.0037 (-0.0185 to 0.0260) | 0.743 | 0.0021 (-0.0204 to 0.0246) | 0.853 |
| Mod 2 | 0.0004 (-0.0218 to 0.0227) | 0.969 | 0.0002 (-0.0223 to 0.0226) | 0.988 |
| Mod 3 | -0.0015 (-0.0238 to 0.0209) | 0.898 | -0.0011 (-0.0236 to 0.0214) | 0.925 |
| **Fibrosis-5 Index (FIB-5)** |  |  |  |  |
| crude | -0.035 (-0.175 to 0.105) | 0.624 | -0.169 (-0.311 to -0.027) | 0.019 |
| Mod 1 | -0.0229 (-0.1557 to 0.1100) | 0.736 | -0.1056 (-0.2398 to 0.0287) | 0.123 |
| Mod 2 | -0.0262 (-0.1592 to 0.1068) | 0.699 | -0.1081 (-0.2425 to 0.0262) | 0.115 |
| Mod 3 | -0.0137 (-0.1471 to 0.1197) | 0.841 | -0.0950 (-0.2296 to 0.0395) | 0.166 |
| **APRI (AST to Platelet Ratio Index)** |  |  |  |  |
| crude | 0.0007 (-0.0044 to 0.0058) | 0.778 | -0.0014 (-0.0065 to 0.0038) | 0.606 |
| Mod 1 | 0.0004 (-0.0045 to 0.0053) | 0.877 | -0.0012 (-0.0061 to 0.0038) | 0.647 |
| Mod 2 | 0.0002 (-0.0047 to 0.0051) | 0.939 | -0.0012 (-0.0062 to 0.0037) | 0.624 |
| Mod 3 | -0.0001 (-0.0050 to 0.0048) | 0.961 | -0.0015 (-0.0064 to 0.0035) | 0.561 |
| **Fatty Liver Index (FLI)** |  |  |  |  |
| crude | -0.672 (-1.277 to -0.067) | 0.029 | -0.643 (-1.256 to -0.029) | 0.040 |
| Mod 1 | -0.798 (-1.382 to -0.215) | 0.007 | -0.679 (-1.269 to -0.089) | 0.024 |
| Mod 2 | -0.463 (-1.026 to 0.099) | 0.106 | -0.428 (-0.997 to 0.140) | 0.140 |
| Mod 3 | -0.354 (-0.917 to 0.209) | 0.217 | -0.352 (-0.921 to 0.217) | 0.225 |
| **Hepatic Steatosis Index (HSI)** |  |  |  |  |
| crude | -0.117 (-0.270 to 0.036) | 0.133 | -0.123 (-0.278 to 0.032) | 0.119 |
| Mod 1 | -0.1014 (-0.2475 to 0.0446) | 0.174 | -0.1141 (-0.2619 to 0.0336) | 0.130 |
| Mod 2 | -0.039 (-0.182 to 0.105) | 0.598 | -0.066 (-0.211 to 0.078) | 0.368 |
| Mod 3 | -0.020 (-0.163 to 0.124) | 0.788 | -0.055 (-0.200 to 0.090) | 0.457 |
| **EPI Creatinine Clearance Index** |  |  |  |  |
| crude | -0.390 (-0.931 to 0.151) | 0.157 | -0.611 (-1.159 to -0.063) | 0.029 |
| Mod 1 | -0.245 (-0.761 to 0.270) | 0.351 | -0.267 (-0.788 to 0.255) | 0.316 |
| Mod 2 | -0.282 (-0.798 to 0.235) | 0.285 | -0.287 (-0.808 to 0.235) | 0.281 |
| Mod 3 | -0.220 (-0.738 to 0.297) | 0.404 | -0.240 (-0.762 to 0.283) | 0.369 |

1 Symbols in beta and 95% CI: * p<0.05, ** p<0.01, ***p<0.001

Model 1 adjusted for baseline age (years), sex, baseline value, and intervention group

Model 2 additional adjusted for education level (higher degree, university, secondary school, primary school, illiterate), baseline physical activity (METs-min/week), smoking status (non-smoker, ex-smoker, smoker, other), Mediterranean Diet adherence score-17p (continuous), total protein intake (g/d), carbohydrates (g/d), and total energy intake (kcal/d)

Model 3 additional adjusted for total vegetable intake (g/d), fruit intake (g/d), legume intake (g/d), fish intake (g/d), and nut intake (g/d)

**Supplemental table 3. Continuation.**

|  | **Spermine** | | | |
| --- | --- | --- | --- | --- |
|  | **v66** | | **v12** | |
|  | **beta (95% CI)1** | **p** | **beta (95% CI)1** | **p** |
| **BMI (kg/m²)** |  |  |  |  |
| crude | -0.117 (-0.186 to -0.049) | 0.001 | -0.146 (-0.215 to -0.076) | <0.001 |
| Mod 1 | -0.118 (-0.183 to -0.052) | <0.001 | -0.134 (-0.200 to -0.068) | <0.001 |
| Mod 2 | -0.076 (-0.138 to -0.014) | 0.016 | -0.103 (-0.166 to -0.040) | 0.001 |
| Mod 3 | -0.0571 (-0.1189 to 0.0046) | 0.070 | -0.0897 (-0.1521 to -0.0273) | 0.005 |
| **Waist (cm)** |  |  |  |  |
| crude | -0.307 (-0.547 to -0.066) | 0.012 | -0.402 (-0.646 to -0.159) | 0.001 |
| Mod 1 | -0.316 (-0.547 to -0.085) | 0.007 | -0.397 (-0.630 to -0.163) | 0.001 |
| Mod 2 | -0.184 (-0.406 to 0.039) | 0.105 | -0.299 (-0.524 to -0.074) | 0.009 |
| Mod 3 | -0.143 (-0.366 to 0.079) | 0.207 | -0.270 (-0.495 to -0.045) | 0.019 |
| **Hip (cm)** |  |  |  |  |
| crude | -0.2476 (-0.4542 to -0.0411) | 0.019 | -0.2235 (-0.4330 to -0.0140) | 0.037 |
| Mod 1 | -0.235 (-0.433 to -0.036) | 0.020 | -0.190 (-0.391 to 0.011) | 0.064 |
| Mod 2 | -0.1570 (-0.3525 to 0.0385) | 0.116 | -0.1347 (-0.3323 to 0.0630) | 0.182 |
| Mod 3 | -0.1285 (-0.3245 to 0.0675) | 0.199 | -0.1145 (-0.3125 to 0.0834) | 0.257 |
| **DBP - Diastolic Blood Pressure (mmHg)** |  |  |  |  |
| crude | -0.268 (-0.667 to 0.131) | 0.188 | 0.034 (-0.371 to 0.438) | 0.871 |
| Mod 1 | -0.273 (-0.655 to 0.110) | 0.162 | 0.025 (-0.362 to 0.411) | 0.901 |
| Mod 2 | -0.240 (-0.622 to 0.143) | 0.219 | 0.053 (-0.333 to 0.439) | 0.786 |
| Mod 3 | -0.177 (-0.560 to 0.206) | 0.366 | 0.107 (-0.280 to 0.493) | 0.589 |
| **SBP - Systolic Blood Pressure (mmHg)** |  |  |  |  |
| crude | -0.267 (-1.002 to 0.468) | 0.477 | -0.034 (-0.779 to 0.710) | 0.928 |
| Mod 1 | -0.276 (-0.979 to 0.428) | 0.443 | -0.098 (-0.810 to 0.613) | 0.786 |
| Mod 2 | -0.201 (-0.904 to 0.502) | 0.575 | -0.044 (-0.754 to 0.666) | 0.903 |
| Mod 3 | -0.084 (-0.789 to 0.621) | 0.815 | 0.060 (-0.651 to 0.772) | 0.868 |
| **Glucose (mg/dL)** |  |  |  |  |
| crude | -0.32 (-1.28 to 0.64) | 0.515 | -0.74 (-1.71 to 0.23) | 0.136 |
| Mod 1 | -0.364 (-1.280 to 0.551) | 0.435 | -0.692 (-1.618 to 0.233) | 0.143 |
| Mod 2 | -0.22 (-1.14 to 0.69) | 0.633 | -0.59 (-1.51 to 0.34) | 0.213 |
| Mod 3 | -0.13 (-1.05 to 0.79) | 0.780 | -0.52 (-1.44 to 0.41) | 0.274 |
| **AST - Aspartate Aminotransferase (U/L)** |  |  |  |  |
| crude | 0.099 (-0.293 to 0.491) | 0.621 | -0.127 (-0.524 to 0.270) | 0.532 |
| Mod 1 | 0.043 (-0.331 to 0.416) | 0.823 | -0.125 (-0.502 to 0.253) | 0.517 |
| Mod 2 | 0.048 (-0.326 to 0.421) | 0.802 | -0.115 (-0.492 to 0.262) | 0.551 |
| Mod 3 | 0.048 (-0.326 to 0.423) | 0.800 | -0.113 (-0.491 to 0.265) | 0.558 |
| **ALT - Alanine Aminotransferase (U/L)** |  |  |  |  |
| crude | -0.0023 (-0.5459 to 0.5413) | 0.993 | -0.0469 (-0.5979 to 0.5040) | 0.867 |
| Mod 1 | -0.081 (-0.597 to 0.436) | 0.759 | -0.144 (-0.666 to 0.378) | 0.588 |
| Mod 2 | 0.0045 (-0.5110 to 0.5199) | 0.986 | -0.0768 (-0.5973 to 0.4437) | 0.772 |
| Mod 3 | 0.010 (-0.506 to 0.527) | 0.968 | -0.077 (-0.598 to 0.444) | 0.772 |
| **Alkaline Phosphatase (U/L)** |  |  |  |  |
| crude | 1.56 (0.42 to 2.70) | 0.007 | 3.76 (2.60 to 4.91) | <0.001 |
| Mod 1 | 1.58 (0.51 to 2.65) | 0.004 | 3.27 (2.20 to 4.35) | <0.001 |
| Mod 2 | 1.65 (0.58 to 2.71) | 0.002 | 3.31 (2.23 to 4.39) | <0.001 |
| Mod 3 | 1.68 (0.61 to 2.75) | 0.002 | 3.32 (2.24 to 4.40) | <0.001 |
| **Gamma GT (U/L)** |  |  |  |  |
| crude | 0.920 (-0.328 to 2.167) | 0.149 | 1.080 (-0.185 to 2.345) | 0.094 |
| Mod 1 | 0.648 (-0.540 to 1.836) | 0.285 | 0.722 (-0.479 to 1.924) | 0.239 |
| Mod 2 | 0.742 (-0.445 to 1.929) | 0.221 | 0.813 (-0.386 to 2.013) | 0.184 |
| Mod 3 | 0.799 (-0.393 to 1.991) | 0.189 | 0.856 (-0.346 to 2.059) | 0.163 |
| **Calcium (mg/dL)** |  |  |  |  |
| crude | -0.0057 (-0.0274 to 0.0160) | 0.606 | -0.0302 (-0.0522 to -0.0083) | 0.007 |
| Mod 1 | -0.0016 (-0.0224 to 0.0192) | 0.879 | -0.0278 (-0.0487 to -0.0068) | 0.010 |
| Mod 2 | -0.0029 (-0.0237 to 0.0178) | 0.782 | -0.0290 (-0.0500 to -0.0080) | 0.007 |
| Mod 3 | -0.0040 (-0.0249 to 0.0169) | 0.707 | -0.0296 (-0.0506 to -0.0086) | 0.006 |

1 Symbols in beta and 95% CI: * p<0.05, ** p<0.01, ***p<0.001

Model 1 adjusted for baseline age (years), sex, baseline value, and intervention group

Model 2 additional adjusted for education level (higher degree, university, secondary school, primary school, illiterate), baseline physical activity (METs-min/week), smoking status (non-smoker, ex-smoker, smoker, other), Mediterranean Diet adherence score-17p (continuous), total protein intake (g/d), carbohydrates (g/d), and total energy intake (kcal/d)

Model 3 additional adjusted for total vegetable intake (g/d), fruit intake (g/d), legume intake (g/d), fish intake (g/d), and nut intake (g/d)

**Supplemental table 3. Continuation.**

|  | **Spermine** | | | |
| --- | --- | --- | --- | --- |
|  | **v66** | | **v12** | |
|  | **beta (95% CI)1** | **p** | **beta (95% CI)1** | **p** |
| **Albumin (g/dL)** |  |  |  |  |
| crude | 0.0056 (-0.0106 to 0.0218) | 0.500 | -0.0188 (-0.0351 to -0.0024) | 0.025 |
| Mod 1 | 0.0038 (-0.0116 to 0.0193) | 0.629 | -0.0213 (-0.0369 to -0.0057) | 0.007 |
| Mod 2 | 0.0026 (-0.0129 to 0.0181) | 0.741 | -0.0222 (-0.0378 to -0.0066) | 0.005 |
| Mod 3 | 0.0022 (-0.0134 to 0.0177) | 0.785 | -0.0225 (-0.0381 to -0.0068) | 0.005 |
| **Total Cholesterol (mg/dL)** |  |  |  |  |
| crude | -0.11 (-1.62 to 1.40) | 0.883 | 1.25 (-0.28 to 2.78) | 0.111 |
| Mod 1 | 0.15 (-1.29 to 1.59) | 0.842 | 1.25 (-0.21 to 2.70) | 0.093 |
| Mod 2 | 0.17 (-1.27 to 1.61) | 0.814 | 1.31 (-0.14 to 2.77) | 0.077 |
| Mod 3 | 0.14 (-1.30 to 1.59) | 0.848 | 1.29 (-0.16 to 2.75) | 0.082 |
| **HDL Cholesterol (mg/dL)** |  |  |  |  |
| crude | 0.0307 (-0.3574 to 0.4187) | 0.877 | -0.2542 (-0.6477 to 0.1393) | 0.205 |
| Mod 1 | 0.152 (-0.218 to 0.522) | 0.421 | -0.261 (-0.635 to 0.113) | 0.172 |
| Mod 2 | 0.0961 (-0.2744 to 0.4666) | 0.611 | -0.2959 (-0.6702 to 0.0784) | 0.121 |
| Mod 3 | 0.0883 (-0.2835 to 0.4600) | 0.642 | -0.2913 (-0.6664 to 0.0838) | 0.128 |
| **LDL (calculated if triglycerides ≤300) (mg/dL)** |  |  |  |  |
| crude | 0.12 (-1.22 to 1.46) | 0.860 | 1.67 (0.31 to 3.02) | 0.016 |
| Mod 1 | 0.27 (-1.01 to 1.55) | 0.681 | 1.57 (0.28 to 2.86) | 0.017 |
| Mod 2 | 0.26 (-1.02 to 1.54) | 0.693 | 1.59 (0.30 to 2.88) | 0.016 |
| Mod 3 | 0.23 (-1.06 to 1.51) | 0.730 | 1.56 (0.26 to 2.85) | 0.018 |
| **Triglycerides (mg/dL)** |  |  |  |  |
| crude | -1.21 (-3.50 to 1.08) | 0.299 | -0.80 (-3.11 to 1.52) | 0.501 |
| Mod 1 | -1.31 (-3.50 to 0.88) | 0.240 | -0.39 (-2.60 to 1.82) | 0.728 |
| Mod 2 | -0.742 (-2.914 to 1.431) | 0.503 | 0.034 (-2.159 to 2.228) | 0.976 |
| Mod 3 | -0.735 (-2.914 to 1.445) | 0.509 | 0.053 (-2.146 to 2.251) | 0.962 |
| **HbA1c (%)** |  |  |  |  |
| crude | -0.0211 (-0.0462 to 0.0040) | 0.099 | -0.0239 (-0.0494 to 0.0015) | 0.065 |
| Mod 1 | -0.0289 (-0.0528 to -0.0050) | 0.018 | -0.0280 (-0.0521 to -0.0039) | 0.023 |
| Mod 2 | -0.0240 (-0.0478 to -0.0002) | 0.048 | -0.0242 (-0.0483 to -0.0002) | 0.048 |
| Mod 3 | -0.0214 (-0.0452 to 0.0024) | 0.078 | -0.0225 (-0.0466 to 0.0015) | 0.066 |
| **IFCC (mmol/mol)** |  |  |  |  |
| crude | -0.140 (-0.385 to 0.105) | 0.263 | -0.218 (-0.466 to 0.031) | 0.086 |
| Mod 1 | -0.2396 (-0.4738 to -0.0054) | 0.045 | -0.2753 (-0.5122 to -0.0385) | 0.023 |
| Mod 2 | -0.1889 (-0.4221 to 0.0442) | 0.112 | -0.2362 (-0.4718 to -0.0005) | 0.049 |
| Mod 3 | -0.1677 (-0.4014 to 0.0659) | 0.159 | -0.2243 (-0.4602 to 0.0116) | 0.062 |

1 Symbols in beta and 95% CI: * p<0.05, ** p<0.01, ***p<0.001

Model 1 adjusted for baseline age (years), sex, baseline value, and intervention group

Model 2 additional adjusted for education level (higher degree, university, secondary school, primary school, illiterate), baseline physical activity (METs-min/week), smoking status (non-smoker, ex-smoker, smoker, other), Mediterranean Diet adherence score-17p (continuous), total protein intake (g/d), carbohydrates (g/d), and total energy intake (kcal/d)

Model 3 additional adjusted for total vegetable intake (g/d), fruit intake (g/d), legume intake (g/d), fish intake (g/d), and nut intake (g/d)

# **Supplemental table 4. Estimated effects of a 20-unit increase in putrescine levels**

|  | **Putrescine** | | | |
| --- | --- | --- | --- | --- |
|  | **v66** | | **v12** | |
|  | **beta (95% CI)1** | **p** | **beta (95% CI)1** | **p** |
| **Waist-to-Hip Ratio** |  |  |  |  |
| crude | -0.0002 (-0.0005 to 0.0001) | 0.189 | 0.0000 (-0.0003 to 0.0003) | 0.921 |
| Mod 1 | -0.0002 (-0.0004 to 0.0001) | 0.186 | 0.0000 (-0.0002 to 0.0003) | 0.836 |
| Mod 2 | -0.0002 (-0.0005 to 0.0000) | 0.105 | 0.0000 (-0.0003 to 0.0002) | 0.952 |
| Mod 3 | -0.0002 (-0.0005 to 0.0000) | 0.071 | 0.0000 (-0.0003 to 0.0002) | 0.823 |
| **Waist-to-Height Ratio** |  |  |  |  |
| crude | 0.0000 (-0.0002 to 0.0001) | 0.725 | 0.0000 (-0.0001 to 0.0002) | 0.607 |
| Mod 1 | 0.0000 (-0.0002 to 0.0002) | 0.988 | 0.0001 (-0.0001 to 0.0003) | 0.331 |
| Mod 2 | -0.0001 (-0.0002 to 0.0001) | 0.546 | 0.0000 (-0.0001 to 0.0002) | 0.678 |
| Mod 3 | -0.0001 (-0.0002 to 0.0001) | 0.380 | 0.0000 (-0.0002 to 0.0002) | 0.873 |
| **Urine Albumin-Creatinine Ratio (UACR)** |  |  |  |  |
| crude | -0.15 (-0.59 to 0.29) | 0.496 | -0.05 (-0.49 to 0.39) | 0.817 |
| Mod 1 | -0.15 (-0.56 to 0.26) | 0.471 | 0.00 (-0.41 to 0.42) | 0.987 |
| Mod 2 | -0.154 (-0.563 to 0.256) | 0.463 | 0.000 (-0.415 to 0.416) | 1.000 |
| Mod 3 | -0.155 (-0.566 to 0.256) | 0.461 | 0.012 (-0.404 to 0.429) | 0.954 |
| **Triglyceride-Glucose Index (TyG)** |  |  |  |  |
| crude | 0.0015 (-0.0008 to 0.0038) | 0.198 | 0.0011 (-0.0012 to 0.0034) | 0.370 |
| Mod 1 | 0.0004 (-0.0018 to 0.0025) | 0.747 | 0.0008 (-0.0014 to 0.0029) | 0.501 |
| Mod 2 | 0.0001 (-0.0020 to 0.0023) | 0.896 | 0.0006 (-0.0016 to 0.0027) | 0.603 |
| Mod 3 | 0.0000 (-0.0021 to 0.0022) | 0.964 | 0.0005 (-0.0017 to 0.0027) | 0.648 |
| **Triglycerides/HDL Ratio** |  |  |  |  |
| crude | 0.0010 (-0.0009 to 0.0030) | 0.302 | 0.0001 (-0.0018 to 0.0021) | 0.900 |
| Mod 1 | 0.0004 (-0.0014 to 0.0022) | 0.680 | 0.0003 (-0.0016 to 0.0021) | 0.760 |
| Mod 2 | 0.0003 (-0.0016 to 0.0021) | 0.774 | 0.0002 (-0.0017 to 0.0020) | 0.839 |
| Mod 3 | 0.0002 (-0.0016 to 0.0020) | 0.816 | 0.0002 (-0.0017 to 0.0020) | 0.861 |
| **Fibrosis-4 Index (FIB-4)** |  |  |  |  |
| crude | 0.0015 (-0.0013 to 0.0043) | 0.295 | 0.0003 (-0.0025 to 0.0032) | 0.810 |
| Mod 1 | 0.0007 (-0.0019 to 0.0034) | 0.585 | 0.0001 (-0.0026 to 0.0028) | 0.959 |
| Mod 2 | 0.0010 (-0.0017 to 0.0036) | 0.464 | 0.0003 (-0.0024 to 0.0029) | 0.847 |
| Mod 3 | 0.0010 (-0.0017 to 0.0036) | 0.467 | 0.0003 (-0.0024 to 0.0030) | 0.838 |
| **Fibrosis-5 Index (FIB-5)** |  |  |  |  |
| crude | 0.013 (-0.004 to 0.030) | 0.147 | -0.004 (-0.021 to 0.013) | 0.658 |
| Mod 1 | 0.0098 (-0.0060 to 0.0256) | 0.222 | -0.0038 (-0.0198 to 0.0122) | 0.645 |
| Mod 2 | 0.0093 (-0.0065 to 0.0251) | 0.248 | -0.0039 (-0.0199 to 0.0121) | 0.631 |
| Mod 3 | 0.0095 (-0.0063 to 0.0254) | 0.237 | -0.0035 (-0.0196 to 0.0125) | 0.667 |
| **APRI (AST to Platelet Ratio Index)** |  |  |  |  |
| crude | -0.0002 (-0.0008 to 0.0004) | 0.581 | 0.0000 (-0.0006 to 0.0006) | 0.986 |
| Mod 1 | -0.0004 (-0.0009 to 0.0002) | 0.239 | -0.0001 (-0.0006 to 0.0005) | 0.865 |
| Mod 2 | -0.0003 (-0.0009 to 0.0003) | 0.288 | 0.0000 (-0.0006 to 0.0006) | 0.930 |
| Mod 3 | -0.0004 (-0.0010 to 0.0002) | 0.218 | -0.0001 (-0.0007 to 0.0005) | 0.815 |
| **Fatty Liver Index (FLI)** |  |  |  |  |
| crude | 0.021 (-0.053 to 0.096) | 0.573 | 0.032 (-0.043 to 0.106) | 0.403 |
| Mod 1 | -0.003 (-0.073 to 0.067) | 0.939 | 0.031 (-0.040 to 0.102) | 0.392 |
| Mod 2 | -0.022 (-0.089 to 0.046) | 0.530 | 0.014 (-0.055 to 0.082) | 0.696 |
| Mod 3 | -0.030 (-0.098 to 0.038) | 0.384 | 0.005 (-0.063 to 0.073) | 0.888 |
| **Hepatic Steatosis Index (HSI)** |  |  |  |  |
| crude | 0.008 (-0.010 to 0.027) | 0.380 | 0.016 (-0.003 to 0.034) | 0.100 |
| Mod 1 | 0.0054 (-0.0120 to 0.0229) | 0.541 | 0.0123 (-0.0054 to 0.0300) | 0.173 |
| Mod 2 | 0.003 (-0.014 to 0.020) | 0.753 | 0.010 (-0.008 to 0.027) | 0.281 |
| Mod 3 | 0.001 (-0.016 to 0.018) | 0.932 | 0.007 (-0.010 to 0.025) | 0.398 |
| **EPI Creatinine Clearance Index** |  |  |  |  |
| crude | -0.030 (-0.097 to 0.036) | 0.367 | -0.033 (-0.099 to 0.033) | 0.326 |
| Mod 1 | 0.007 (-0.055 to 0.068) | 0.832 | -0.018 (-0.080 to 0.044) | 0.568 |
| Mod 2 | 0.008 (-0.054 to 0.069) | 0.806 | -0.017 (-0.080 to 0.045) | 0.583 |
| Mod 3 | 0.009 (-0.053 to 0.071) | 0.772 | -0.016 (-0.079 to 0.046) | 0.610 |

1 Symbols in beta and 95% CI: * p<0.05, ** p<0.01, ***p<0.001

Model 1 adjusted for baseline age (years), sex, baseline value, and intervention group

Model 2 additional adjusted for education level (higher degree, university, secondary school, primary school, illiterate), baseline physical activity (METs-min/week), smoking status (non-smoker, ex-smoker, smoker, other), Mediterranean Diet adherence score-17p (continuous), total protein intake (g/d), carbohydrates (g/d), and total energy intake (kcal/d)

Model 3 additional adjusted for total vegetable intake (g/d), fruit intake (g/d), legume intake (g/d), fish intake (g/d), and nut intake (g/d)

**Supplemental table 4. Continuation.**

|  | **Putrescine** | | | | | | | |
| --- | --- | --- | --- | --- | --- | --- | --- | --- |
|  | **v66** | | | | **v12** | | | |
|  | **beta (95% CI)1** | | **p** | | **beta (95% CI)1** | | **p** | |
| **BMI (kg/m²)** | |  | |  | |  | |  |
| crude | | 0.012 (0.003 to 0.020) | | 0.007 | | 0.010 (0.001 to 0.018) | | 0.022 |
| Mod 1 | | 0.011 (0.003 to 0.019) | | 0.005 | | 0.008 (0.000 to 0.016) | | 0.041 |
| Mod 2 | | 0.009 (0.001 to 0.016) | | 0.021 | | 0.006 (-0.001 to 0.014) | | 0.116 |
| Mod 3 | | 0.0076 (0.0002 to 0.0150) | | 0.045 | | 0.0048 (-0.0027 to 0.0122) | | 0.212 |
| **Waist (cm)** | |  | |  | |  | |  |
| crude | | -0.007 (-0.037 to 0.022) | | 0.620 | | 0.004 (-0.025 to 0.034) | | 0.789 |
| Mod 1 | | -0.002 (-0.030 to 0.025) | | 0.864 | | 0.010 (-0.018 to 0.038) | | 0.466 |
| Mod 2 | | -0.011 (-0.038 to 0.016) | | 0.425 | | 0.002 (-0.025 to 0.029) | | 0.873 |
| Mod 3 | | -0.015 (-0.042 to 0.012) | | 0.276 | | -0.002 (-0.029 to 0.025) | | 0.904 |
| **Hip (cm)** | |  | |  | |  | |  |
| crude | | 0.0137 (-0.0117 to 0.0390) | | 0.291 | | 0.0065 (-0.0188 to 0.0319) | | 0.613 |
| Mod 1 | | 0.019 (-0.005 to 0.043) | | 0.118 | | 0.009 (-0.015 to 0.034) | | 0.440 |
| Mod 2 | | 0.0141 (-0.0094 to 0.0375) | | 0.239 | | 0.0048 (-0.0189 to 0.0285) | | 0.690 |
| Mod 3 | | 0.0127 (-0.0108 to 0.0362) | | 0.290 | | 0.0033 (-0.0204 to 0.0270) | | 0.785 |
| **DBP - Diastolic Blood Pressure (mmHg)** | |  | |  | |  | |  |
| crude | | -0.009 (-0.057 to 0.040) | | 0.730 | | -0.020 (-0.068 to 0.029) | | 0.433 |
| Mod 1 | | -0.005 (-0.051 to 0.040) | | 0.814 | | -0.018 (-0.064 to 0.029) | | 0.456 |
| Mod 2 | | -0.006 (-0.051 to 0.040) | | 0.804 | | -0.019 (-0.065 to 0.027) | | 0.423 |
| Mod 3 | | -0.006 (-0.052 to 0.039) | | 0.787 | | -0.018 (-0.065 to 0.028) | | 0.433 |
| **SBP - Systolic Blood Pressure (mmHg)** | |  | |  | |  | |  |
| crude | | 0.073 (-0.017 to 0.162) | | 0.110 | | 0.061 (-0.029 to 0.150) | | 0.186 |
| Mod 1 | | 0.063 (-0.021 to 0.146) | | 0.142 | | 0.048 (-0.036 to 0.133) | | 0.264 |
| Mod 2 | | 0.057 (-0.027 to 0.140) | | 0.184 | | 0.042 (-0.043 to 0.127) | | 0.329 |
| Mod 3 | | 0.055 (-0.029 to 0.138) | | 0.201 | | 0.042 (-0.043 to 0.127) | | 0.333 |
| **Glucose (mg/dL)** | |  | |  | |  | |  |
| crude | | 0.07 (-0.05 to 0.18) | | 0.259 | | 0.01 (-0.10 to 0.13) | | 0.811 |
| Mod 1 | | 0.041 (-0.068 to 0.150) | | 0.461 | | -0.026 (-0.136 to 0.085) | | 0.648 |
| Mod 2 | | 0.03 (-0.08 to 0.14) | | 0.547 | | -0.03 (-0.14 to 0.08) | | 0.563 |
| Mod 3 | | 0.03 (-0.08 to 0.14) | | 0.636 | | -0.04 (-0.15 to 0.07) | | 0.490 |
| **AST - Aspartate Aminotransferase (U/L)** | |  | |  | |  | |  |
| crude | | -0.020 (-0.068 to 0.028) | | 0.414 | | -0.007 (-0.055 to 0.041) | | 0.781 |
| Mod 1 | | -0.036 (-0.080 to 0.008) | | 0.111 | | -0.010 (-0.055 to 0.035) | | 0.668 |
| Mod 2 | | -0.035 (-0.079 to 0.010) | | 0.125 | | -0.009 (-0.054 to 0.036) | | 0.702 |
| Mod 3 | | -0.040 (-0.084 to 0.005) | | 0.081 | | -0.013 (-0.058 to 0.032) | | 0.571 |
| **ALT - Alanine Aminotransferase (U/L)** | |  | |  | |  | |  |
| crude | | -0.0451 (-0.1113 to 0.0211) | | 0.182 | | 0.0001 (-0.0663 to 0.0665) | | 0.997 |
| Mod 1 | | -0.067 (-0.128 to -0.005) | | 0.033 | | -0.008 (-0.071 to 0.054) | | 0.790 |
| Mod 2 | | -0.0662 (-0.1273 to -0.0051) | | 0.034 | | -0.0086 (-0.0705 to 0.0534) | | 0.787 |
| Mod 3 | | -0.075 (-0.136 to -0.013) | | 0.017 | | -0.017 (-0.079 to 0.045) | | 0.599 |
| **Alkaline Phosphatase (U/L)** | |  | |  | |  | |  |
| crude | | 0.07 (-0.07 to 0.21) | | 0.307 | | 0.09 (-0.05 to 0.23) | | 0.197 |
| Mod 1 | | 0.07 (-0.05 to 0.20) | | 0.246 | | 0.09 (-0.04 to 0.21) | | 0.185 |
| Mod 2 | | 0.07 (-0.06 to 0.19) | | 0.294 | | 0.08 (-0.04 to 0.21) | | 0.201 |
| Mod 3 | | 0.07 (-0.06 to 0.19) | | 0.289 | | 0.08 (-0.04 to 0.21) | | 0.200 |
| **Gamma GT (U/L)** | |  | |  | |  | |  |
| crude | | 0.013 (-0.139 to 0.166) | | 0.863 | | 0.033 (-0.120 to 0.186) | | 0.673 |
| Mod 1 | | -0.030 (-0.172 to 0.112) | | 0.680 | | 0.049 (-0.095 to 0.193) | | 0.503 |
| Mod 2 | | -0.037 (-0.179 to 0.105) | | 0.609 | | 0.045 (-0.098 to 0.188) | | 0.538 |
| Mod 3 | | -0.039 (-0.181 to 0.103) | | 0.591 | | 0.044 (-0.100 to 0.188) | | 0.547 |
| **Calcium (mg/dL)** | |  | |  | |  | |  |
| crude | | -0.0010 (-0.0036 to 0.0016) | | 0.457 | | -0.0019 (-0.0046 to 0.0007) | | 0.150 |
| Mod 1 | | -0.0011 (-0.0035 to 0.0014) | | 0.397 | | -0.0021 (-0.0046 to 0.0004) | | 0.097 |
| Mod 2 | | -0.0011 (-0.0035 to 0.0014) | | 0.402 | | -0.0021 (-0.0045 to 0.0004) | | 0.108 |
| Mod 3 | | -0.0011 (-0.0035 to 0.0014) | | 0.390 | | -0.0021 (-0.0046 to 0.0004) | | 0.105 |

1 Symbols in beta and 95% CI: * p<0.05, ** p<0.01, ***p<0.001

Model 1 adjusted for baseline age (years), sex, baseline value, and intervention group

Model 2 additional adjusted for education level (higher degree, university, secondary school, primary school, illiterate), baseline physical activity (METs-min/week), smoking status (non-smoker, ex-smoker, smoker, other), Mediterranean Diet adherence score-17p (continuous), total protein intake (g/d), carbohydrates (g/d), and total energy intake (kcal/d)

Model 3 additional adjusted for total vegetable intake (g/d), fruit intake (g/d), legume intake (g/d), fish intake (g/d), and nut intake (g/d)

**Supplemental table 4. Continuation.**

|  | **Putrescine** | | | | | | | |
| --- | --- | --- | --- | --- | --- | --- | --- | --- |
|  | **v66** | | | | **v12** | | | |
|  | **beta (95% CI)1** | | **p** | | **beta (95% CI)1** | | **p** | |
| **Albumin (g/dL)** | |  | |  | |  | |  |
| crude | | 0.0030 (0.0011 to 0.0050) | | 0.002 | | 0.0008 (-0.0012 to 0.0028) | | 0.425 |
| Mod 1 | | 0.0024 (0.0006 to 0.0042) | | 0.009 | | 0.0005 (-0.0014 to 0.0023) | | 0.617 |
| Mod 2 | | 0.0024 (0.0006 to 0.0042) | | 0.010 | | 0.0004 (-0.0014 to 0.0023) | | 0.638 |
| Mod 3 | | 0.0026 (0.0007 to 0.0044) | | 0.006 | | 0.0006 (-0.0013 to 0.0024) | | 0.534 |
| **Total Cholesterol (mg/dL)** | |  | |  | |  | |  |
| crude | | 0.21 (0.03 to 0.39) | | 0.025 | | 0.16 (-0.03 to 0.34) | | 0.094 |
| Mod 1 | | 0.17 (0.00 to 0.34) | | 0.053 | | 0.16 (-0.01 to 0.34) | | 0.063 |
| Mod 2 | | 0.17 (0.00 to 0.34) | | 0.050 | | 0.17 (-0.01 to 0.34) | | 0.058 |
| Mod 3 | | 0.18 (0.01 to 0.35) | | 0.039 | | 0.18 (0.00 to 0.35) | | 0.046 |
| **HDL Cholesterol (mg/dL)** | |  | |  | |  | |  |
| crude | | 0.0189 (-0.0285 to 0.0664) | | 0.435 | | -0.0297 (-0.0772 to 0.0179) | | 0.221 |
| Mod 1 | | 0.033 (-0.012 to 0.077) | | 0.148 | | -0.021 (-0.066 to 0.023) | | 0.347 |
| Mod 2 | | 0.0342 (-0.0100 to 0.0784) | | 0.129 | | -0.0203 (-0.0650 to 0.0244) | | 0.373 |
| Mod 3 | | 0.0338 (-0.0105 to 0.0781) | | 0.135 | | -0.0204 (-0.0652 to 0.0244) | | 0.372 |
| **LDL (calculated if triglycerides ≤300) (mg/dL)** | |  | |  | |  | |  |
| crude | | 0.16 (-0.01 to 0.32) | | 0.059 | | 0.16 (0.00 to 0.32) | | 0.057 |
| Mod 1 | | 0.13 (-0.02 to 0.28) | | 0.089 | | 0.16 (0.01 to 0.32) | | 0.037 |
| Mod 2 | | 0.14 (-0.02 to 0.29) | | 0.079 | | 0.17 (0.01 to 0.32) | | 0.032 |
| Mod 3 | | 0.15 (-0.01 to 0.30) | | 0.059 | | 0.18 (0.02 to 0.33) | | 0.024 |
| **Triglycerides (mg/dL)** | |  | |  | |  | |  |
| crude | | 0.20 (-0.08 to 0.48) | | 0.160 | | 0.16 (-0.11 to 0.44) | | 0.248 |
| Mod 1 | | 0.05 (-0.21 to 0.31) | | 0.686 | | 0.14 (-0.13 to 0.40) | | 0.304 |
| Mod 2 | | 0.040 (-0.219 to 0.298) | | 0.764 | | 0.126 (-0.135 to 0.388) | | 0.344 |
| Mod 3 | | 0.039 (-0.220 to 0.297) | | 0.771 | | 0.128 (-0.134 to 0.390) | | 0.339 |
| **HbA1c (%)** | |  | |  | |  | |  |
| crude | | 0.0003 (-0.0028 to 0.0034) | | 0.842 | | 0.0005 (-0.0026 to 0.0036) | | 0.743 |
| Mod 1 | | 0.0005 (-0.0023 to 0.0034) | | 0.727 | | 0.0001 (-0.0028 to 0.0030) | | 0.930 |
| Mod 2 | | 0.0002 (-0.0026 to 0.0031) | | 0.866 | | -0.0001 (-0.0030 to 0.0028) | | 0.940 |
| Mod 3 | | -0.0001 (-0.0030 to 0.0027) | | 0.936 | | -0.0005 (-0.0033 to 0.0024) | | 0.749 |
| **IFCC (mmol/mol)** | |  | |  | |  | |  |
| crude | | -0.006 (-0.036 to 0.024) | | 0.712 | | -0.004 (-0.034 to 0.026) | | 0.796 |
| Mod 1 | | -0.0024 (-0.0304 to 0.0256) | | 0.867 | | -0.0109 (-0.0392 to 0.0175) | | 0.452 |
| Mod 2 | | -0.0053 (-0.0331 to 0.0226) | | 0.711 | | -0.0130 (-0.0412 to 0.0151) | | 0.365 |
| Mod 3 | | -0.0091 (-0.0369 to 0.0188) | | 0.524 | | -0.0170 (-0.0452 to 0.0112) | | 0.237 |

1 Symbols in beta and 95% CI: * p<0.05, ** p<0.01, ***p<0.001

Model 1 adjusted for baseline age (years), sex, baseline value, and intervention group

Model 2 additional adjusted for education level (higher degree, university, secondary school, primary school, illiterate), baseline physical activity (METs-min/week), smoking status (non-smoker, ex-smoker, smoker, other), Mediterranean Diet adherence score-17p (continuous), total protein intake (g/d), carbohydrates (g/d), and total energy intake (kcal/d)

Model 3 additional adjusted for total vegetable intake (g/d), fruit intake (g/d), legume intake (g/d), fish intake (g/d), and nut intake (g/d)

# **For treatment stratified analysis (Supplemental Figure 1 to 7):**

Two complementary approaches were applied to analyze the use of hormonal, thyroid, and osteoporosis treatments throughout the study period:

1. **Cross-sectional distribution at each time point**: The first approach focused on the number of participants receiving each specific treatment at baseline, 6 months, and 12 months, independently. At baseline, 60 participants were undergoing hormonal treatment, decreasing slightly to 56 participants at visit 6 and 54 at visit 12. Regarding thyroid treatment, 254 participants were receiving it at baseline, with a slight increase to 258 at visit 6 and 259 at visit 12. As for osteoporosis treatment, 293 participants were on treatment at baseline, which increased to 358 at visit 6 and further to 410 at visit 12. These numbers reflect the distribution of participants receiving each specific treatment (hormonal, thyroid, or osteoporosis-related) at the three different time points (0, 6, and 12 months), regardless of continuity over time

2. **Longitudinal consistency in treatment use across all time points**: The second approach aimed to identify participants with sustained treatment use across all three visits. A total of 25 participants consistently received hormonal treatment at baseline, visit 6, and visit 12 (i.e., uninterrupted treatment across all visits). The same was observed for thyroid treatment, with 254 participants maintaining continuous use at all three time points. In the case of osteoporosis treatment, 189 participants were on treatment across baseline, visit 6, and visit 12 without interruption. These values represent participants with sustained pharmacological treatment over the full 12-month follow-up

# **Supplemental figure 1. Stratified analysis effects of dietary SPD on FLI according to pharmacological treatment**


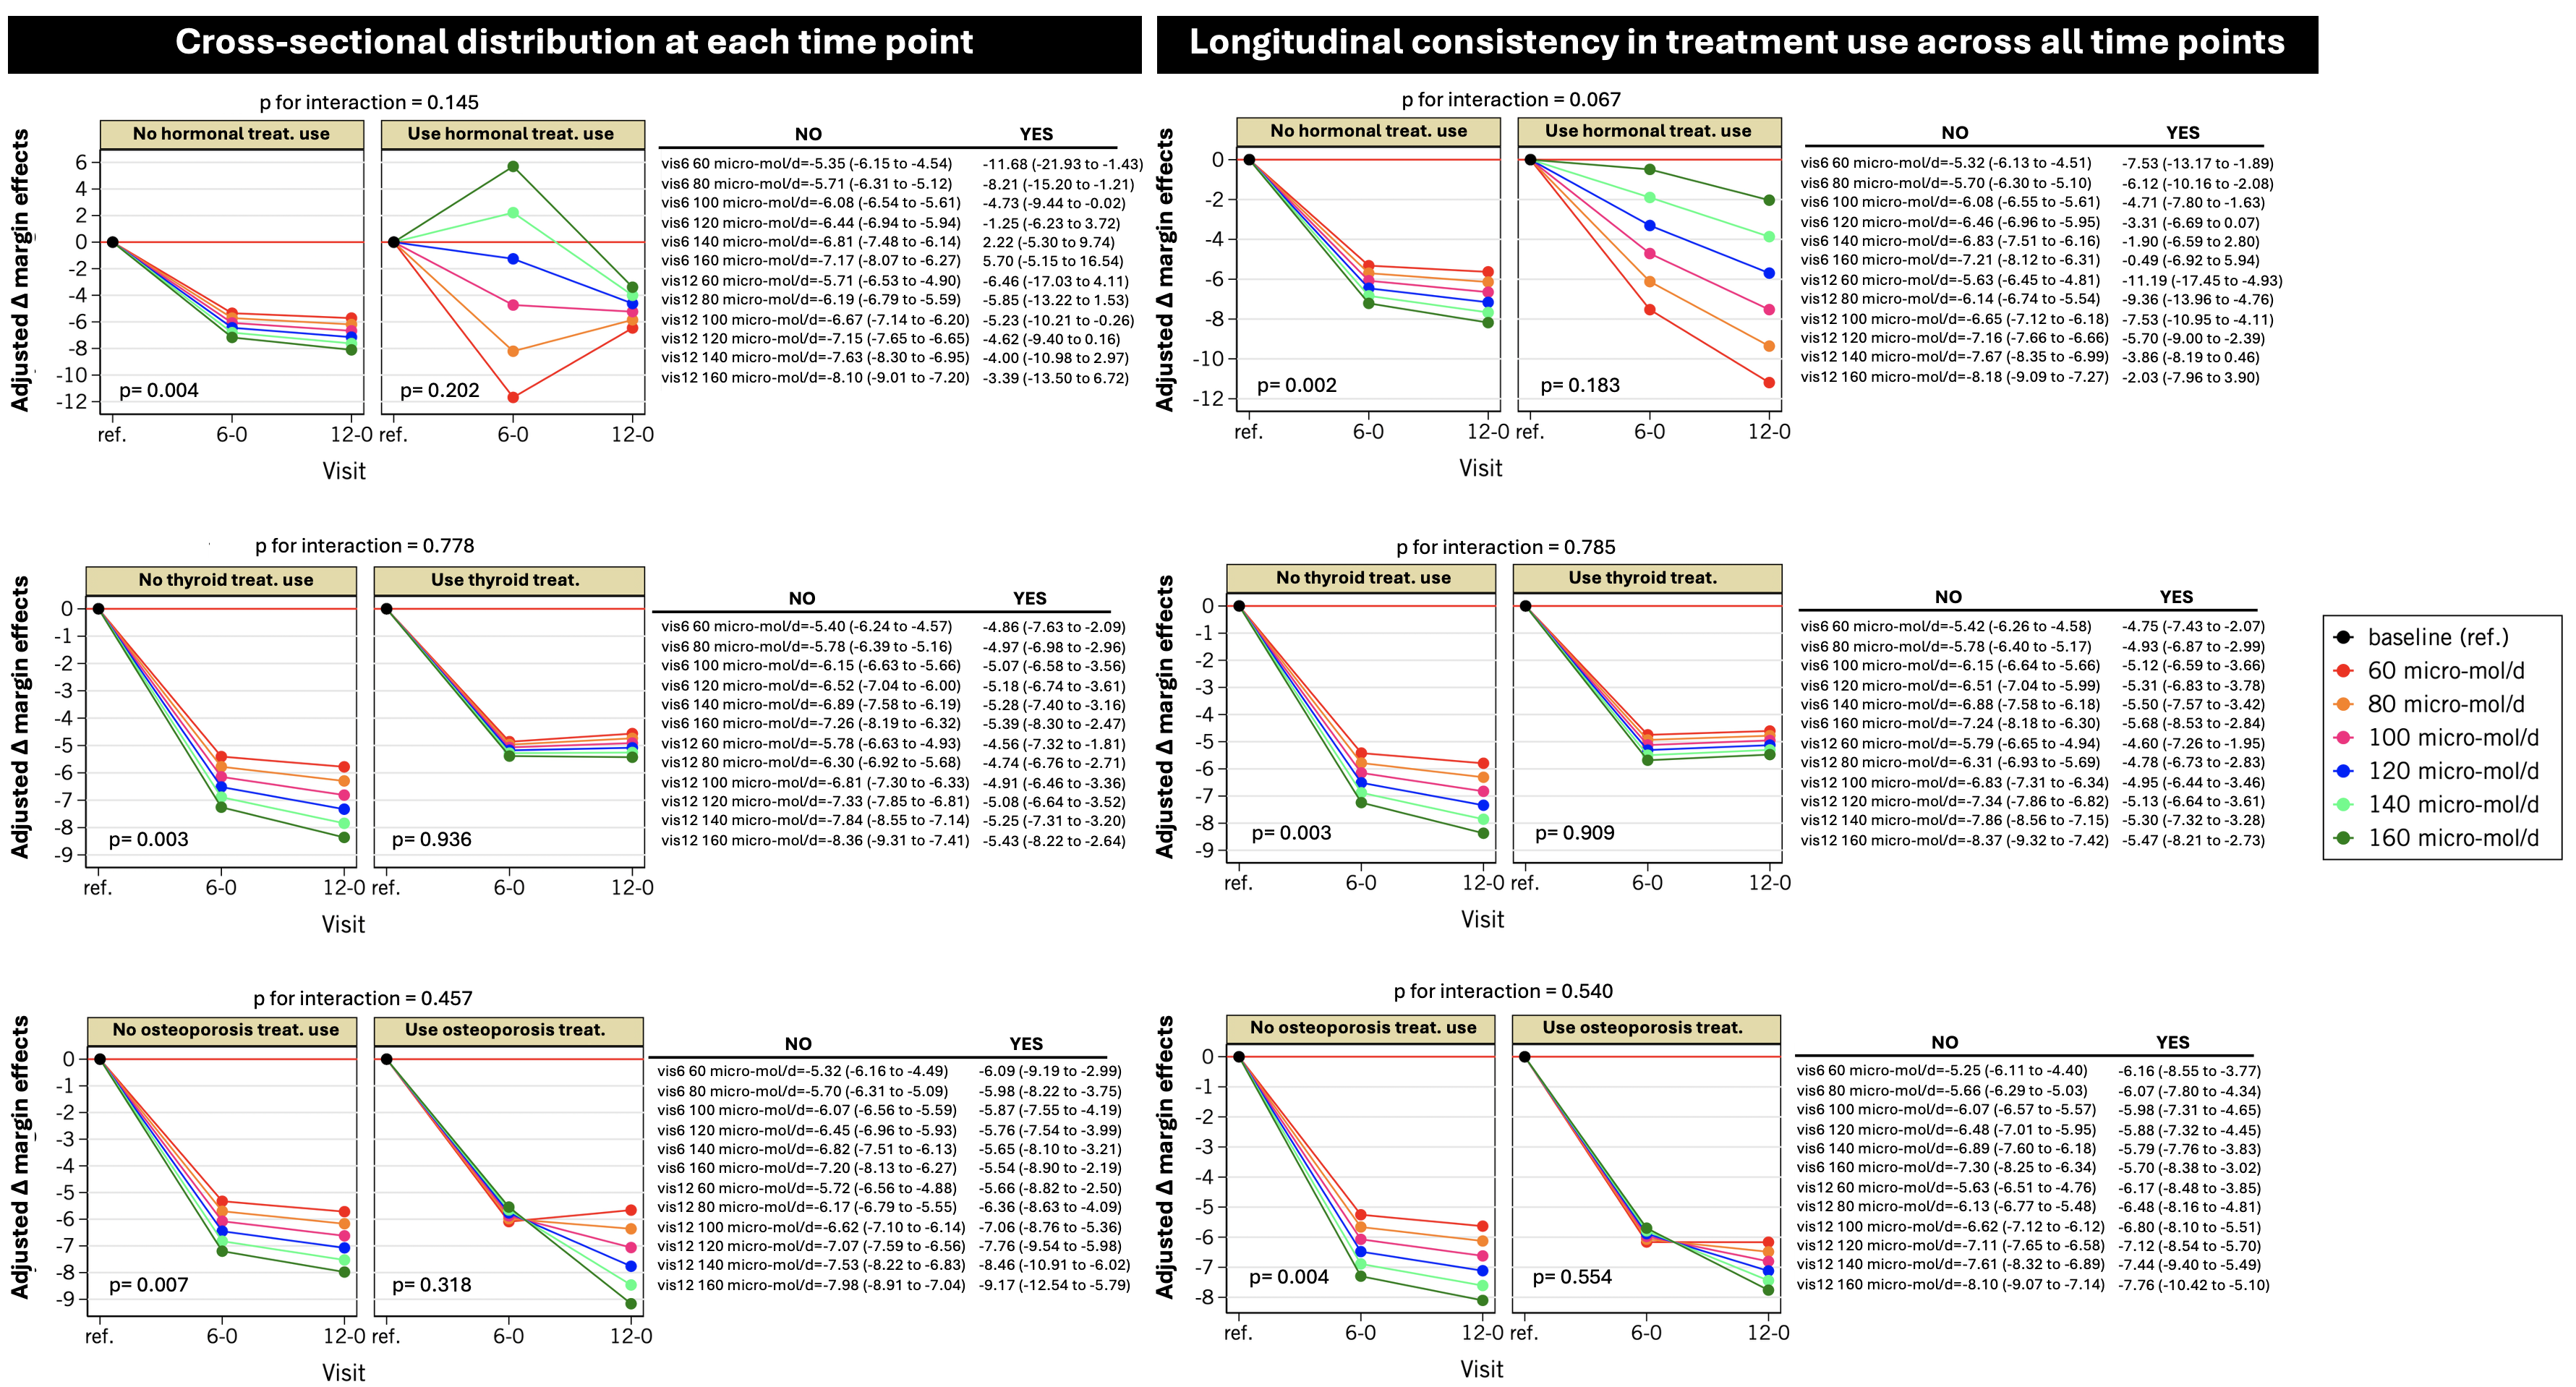


# **Supplemental figure 2. Stratified analysis effects of dietary SPD on HSI according to pharmacological treatment**


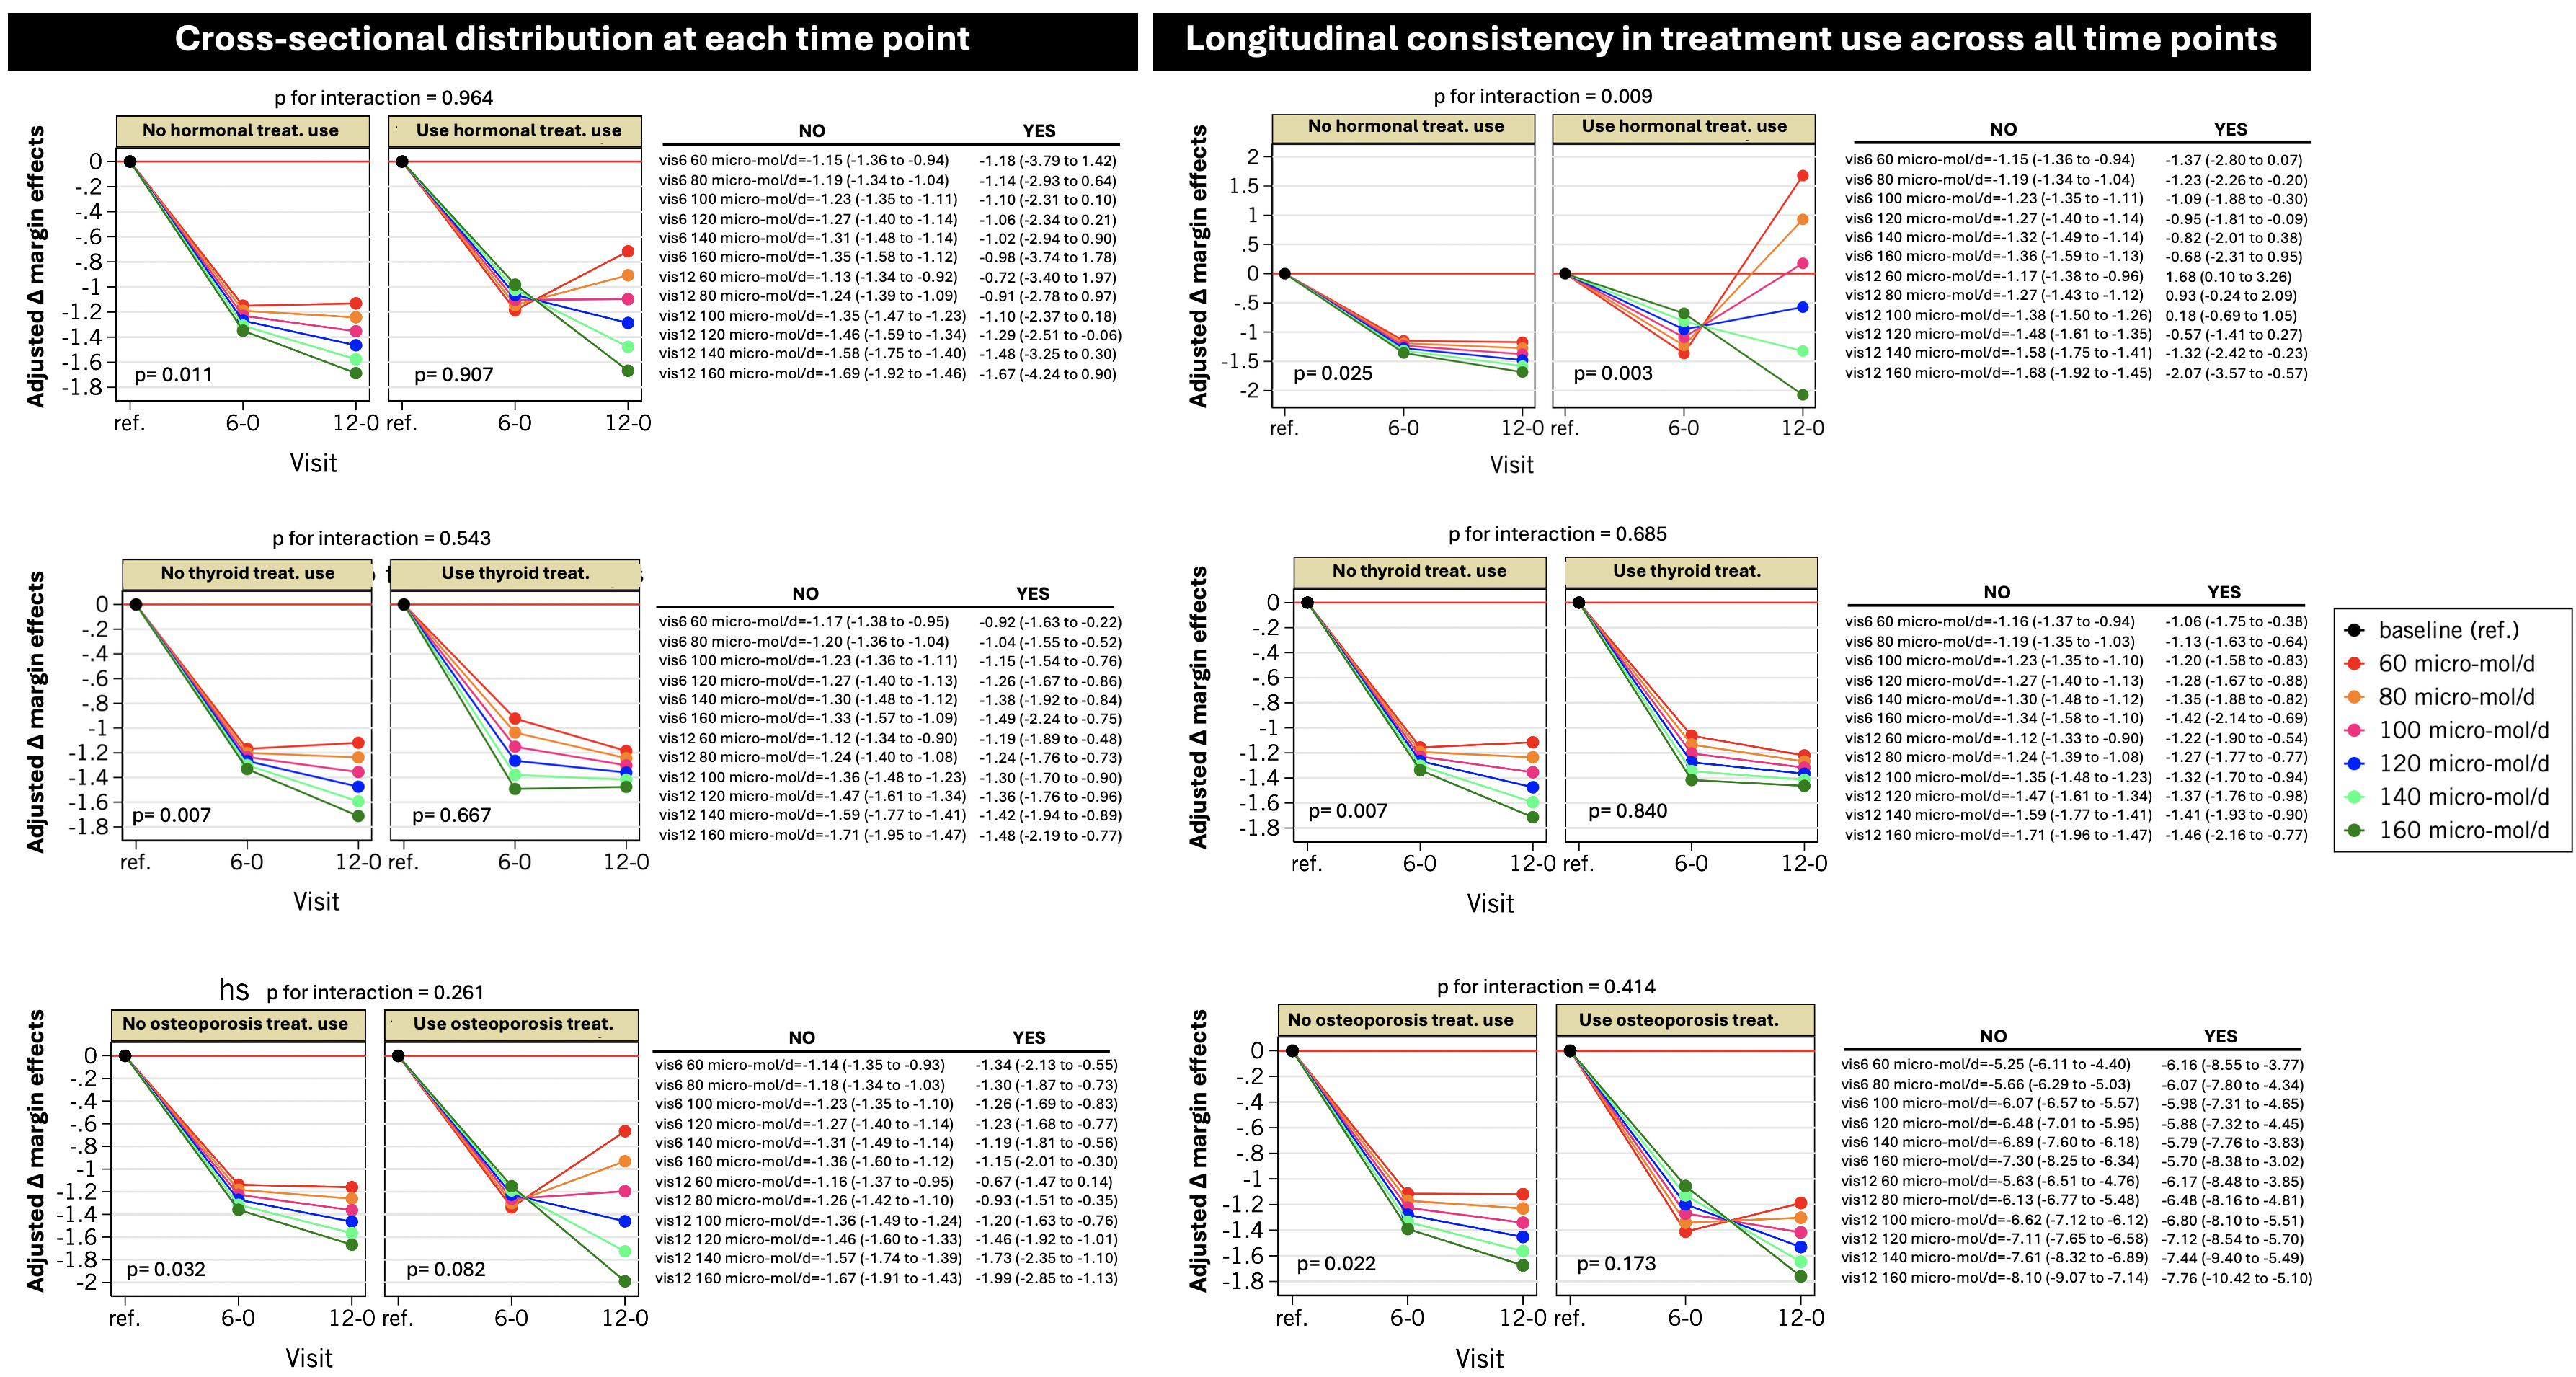


# **Supplemental figure 3. Stratified analysis effects of dietary SPD on AST according to pharmacological treatment**


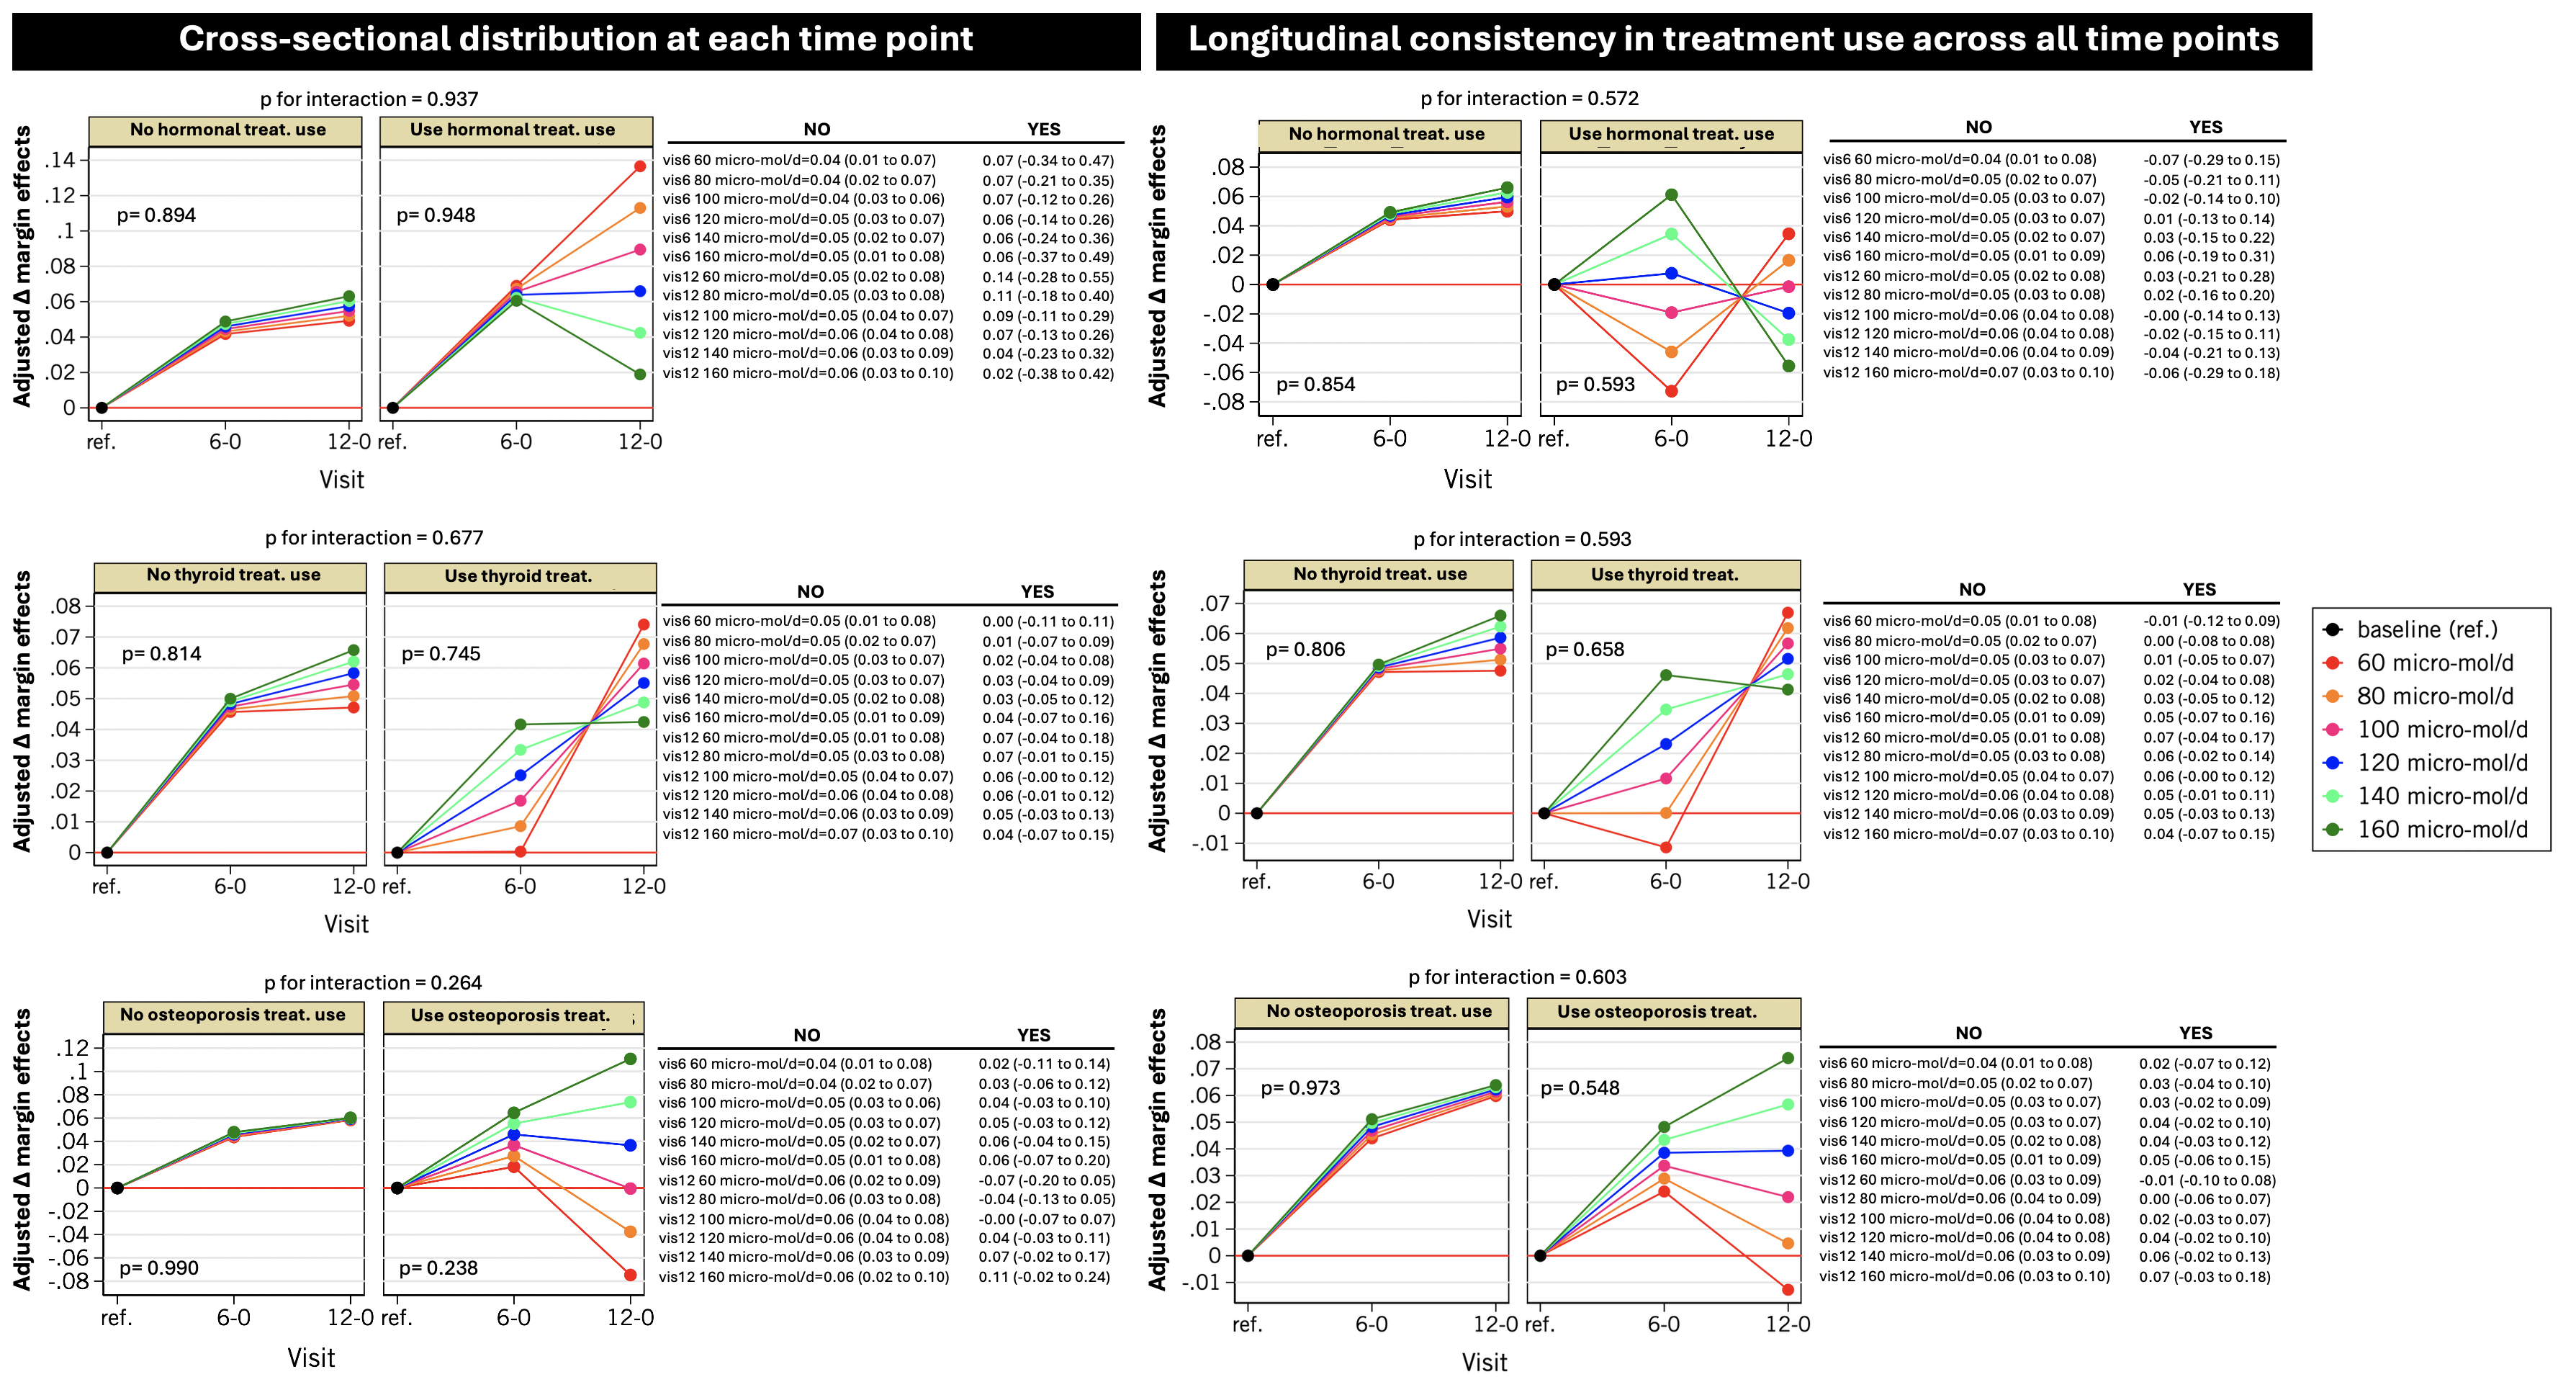


# **Supplemental figure 4. Stratified analysis effects of dietary SPD on ALT according to pharmacological treatment**


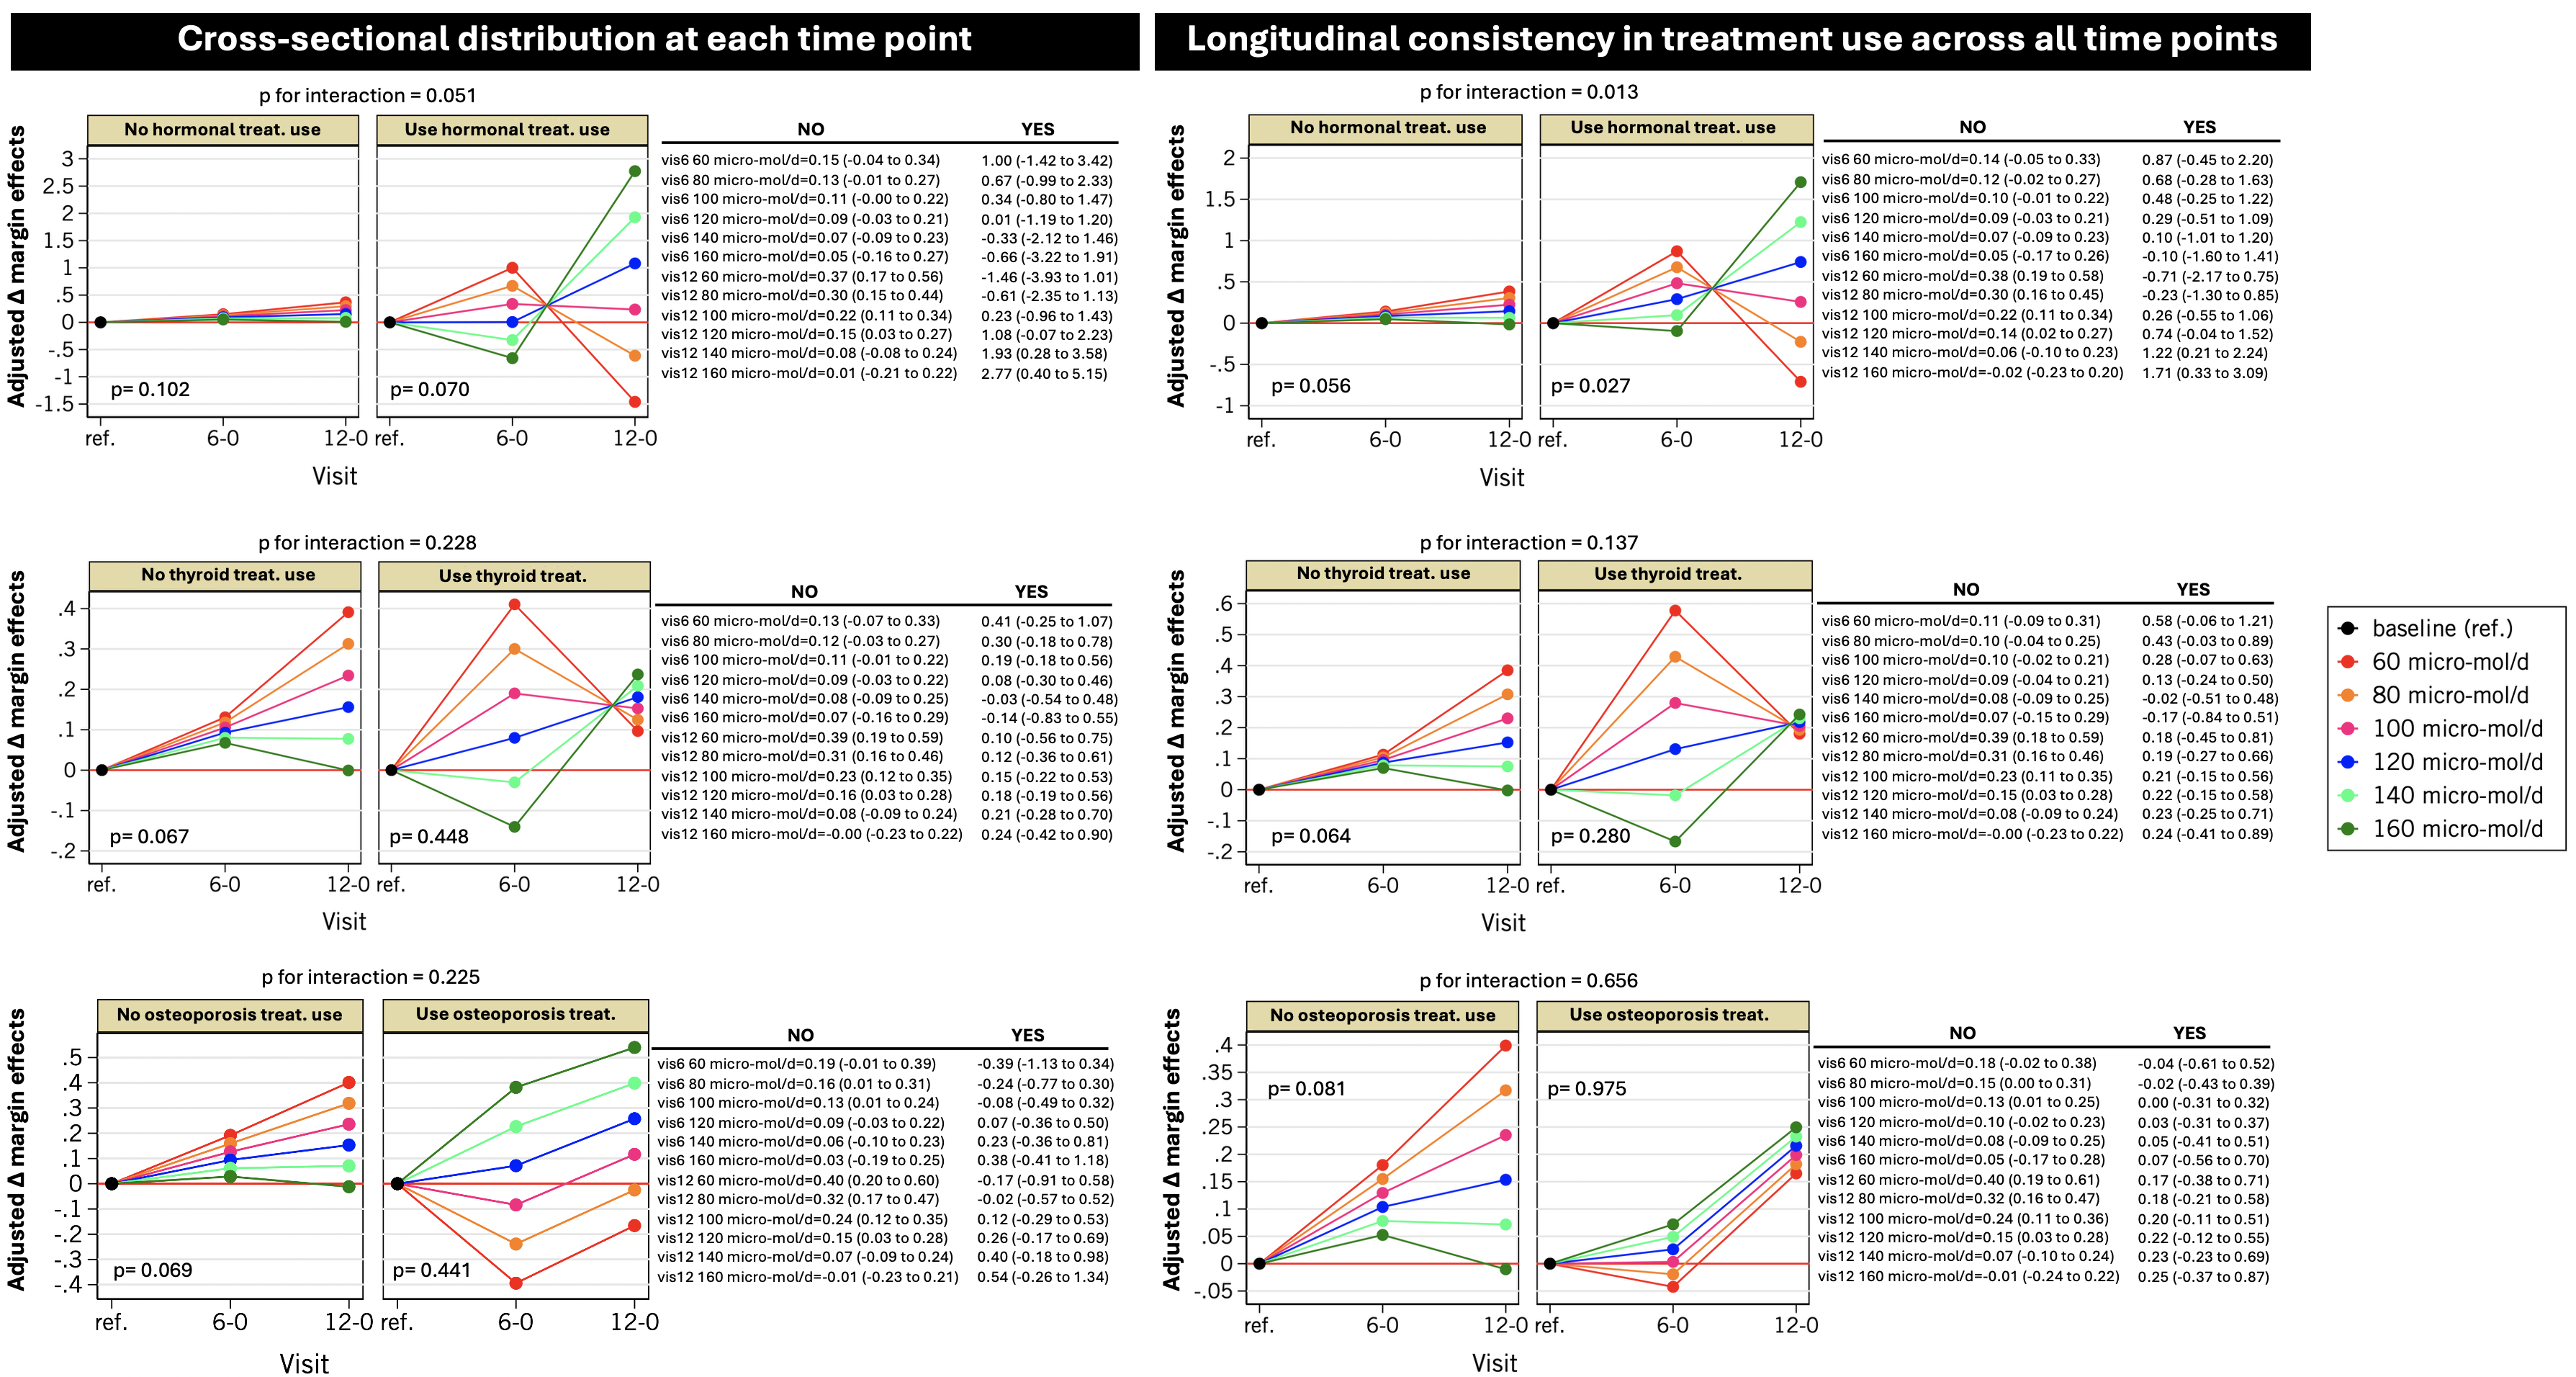


# **Supplemental figure 5. Stratified analysis effects of dietary SPD on alkaline phosphatase according to pharmacological treatment**


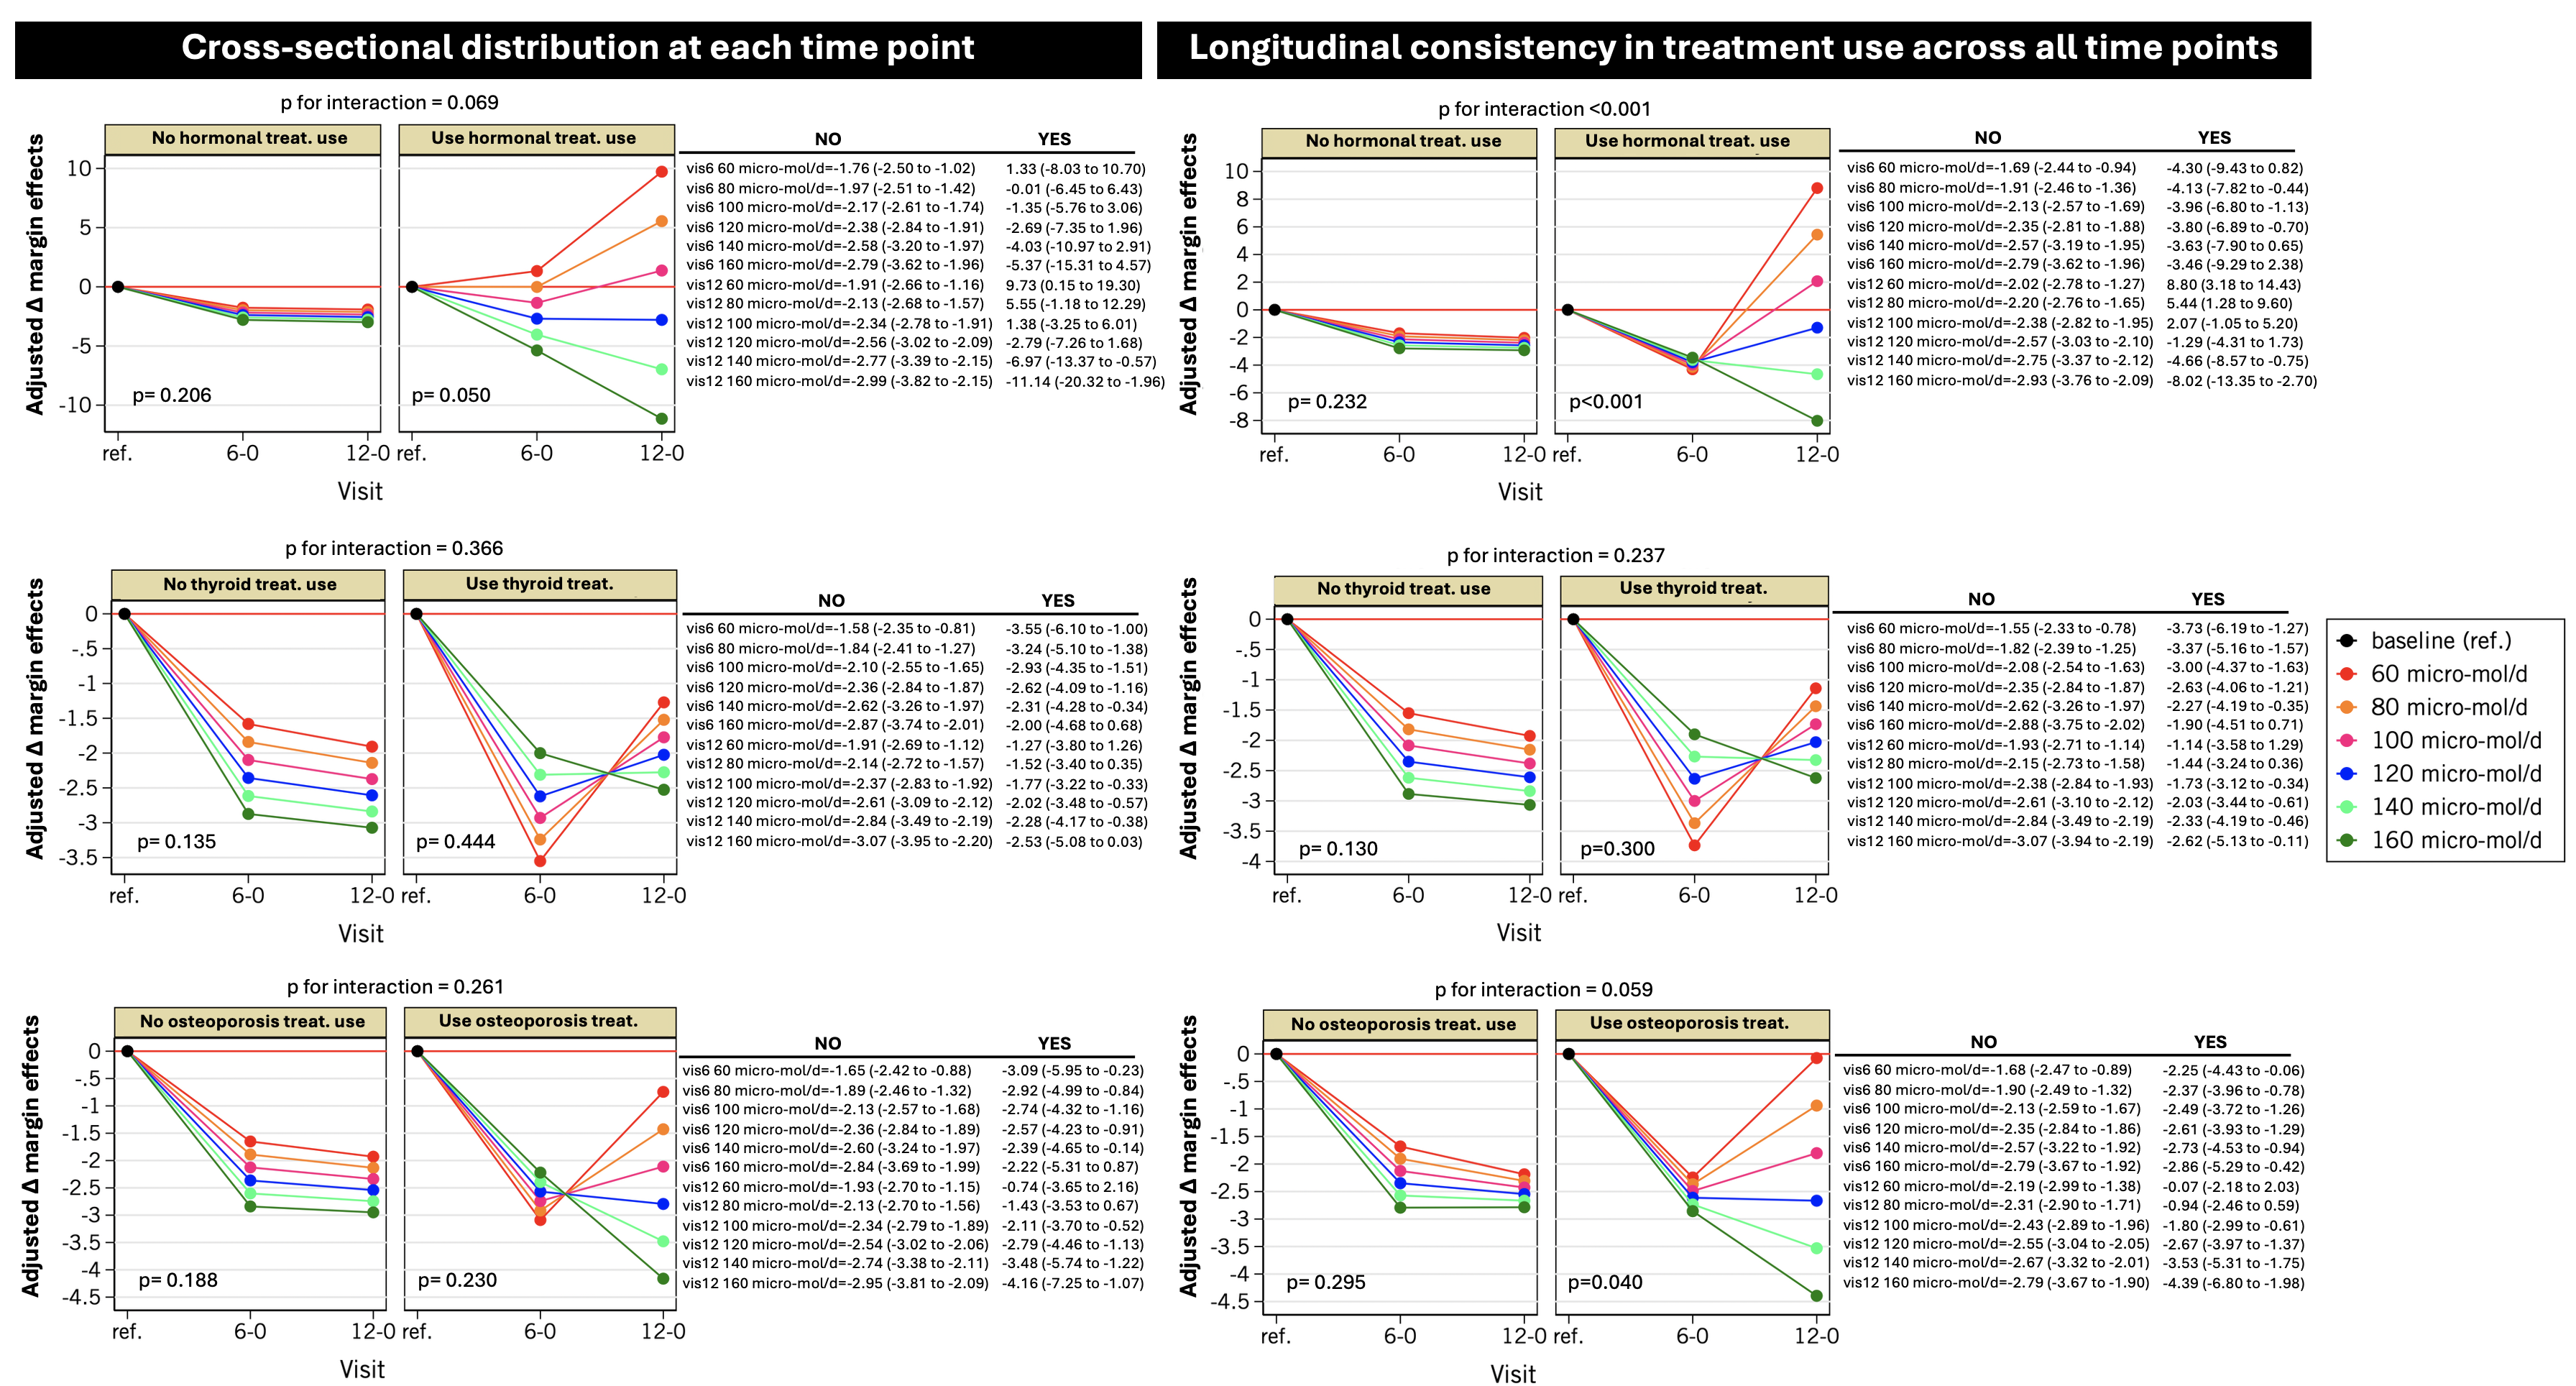


# **Supplemental figure 6. Stratified analysis effects of dietary SPD on gamma glutamyl transferase according to pharmacological treatment**


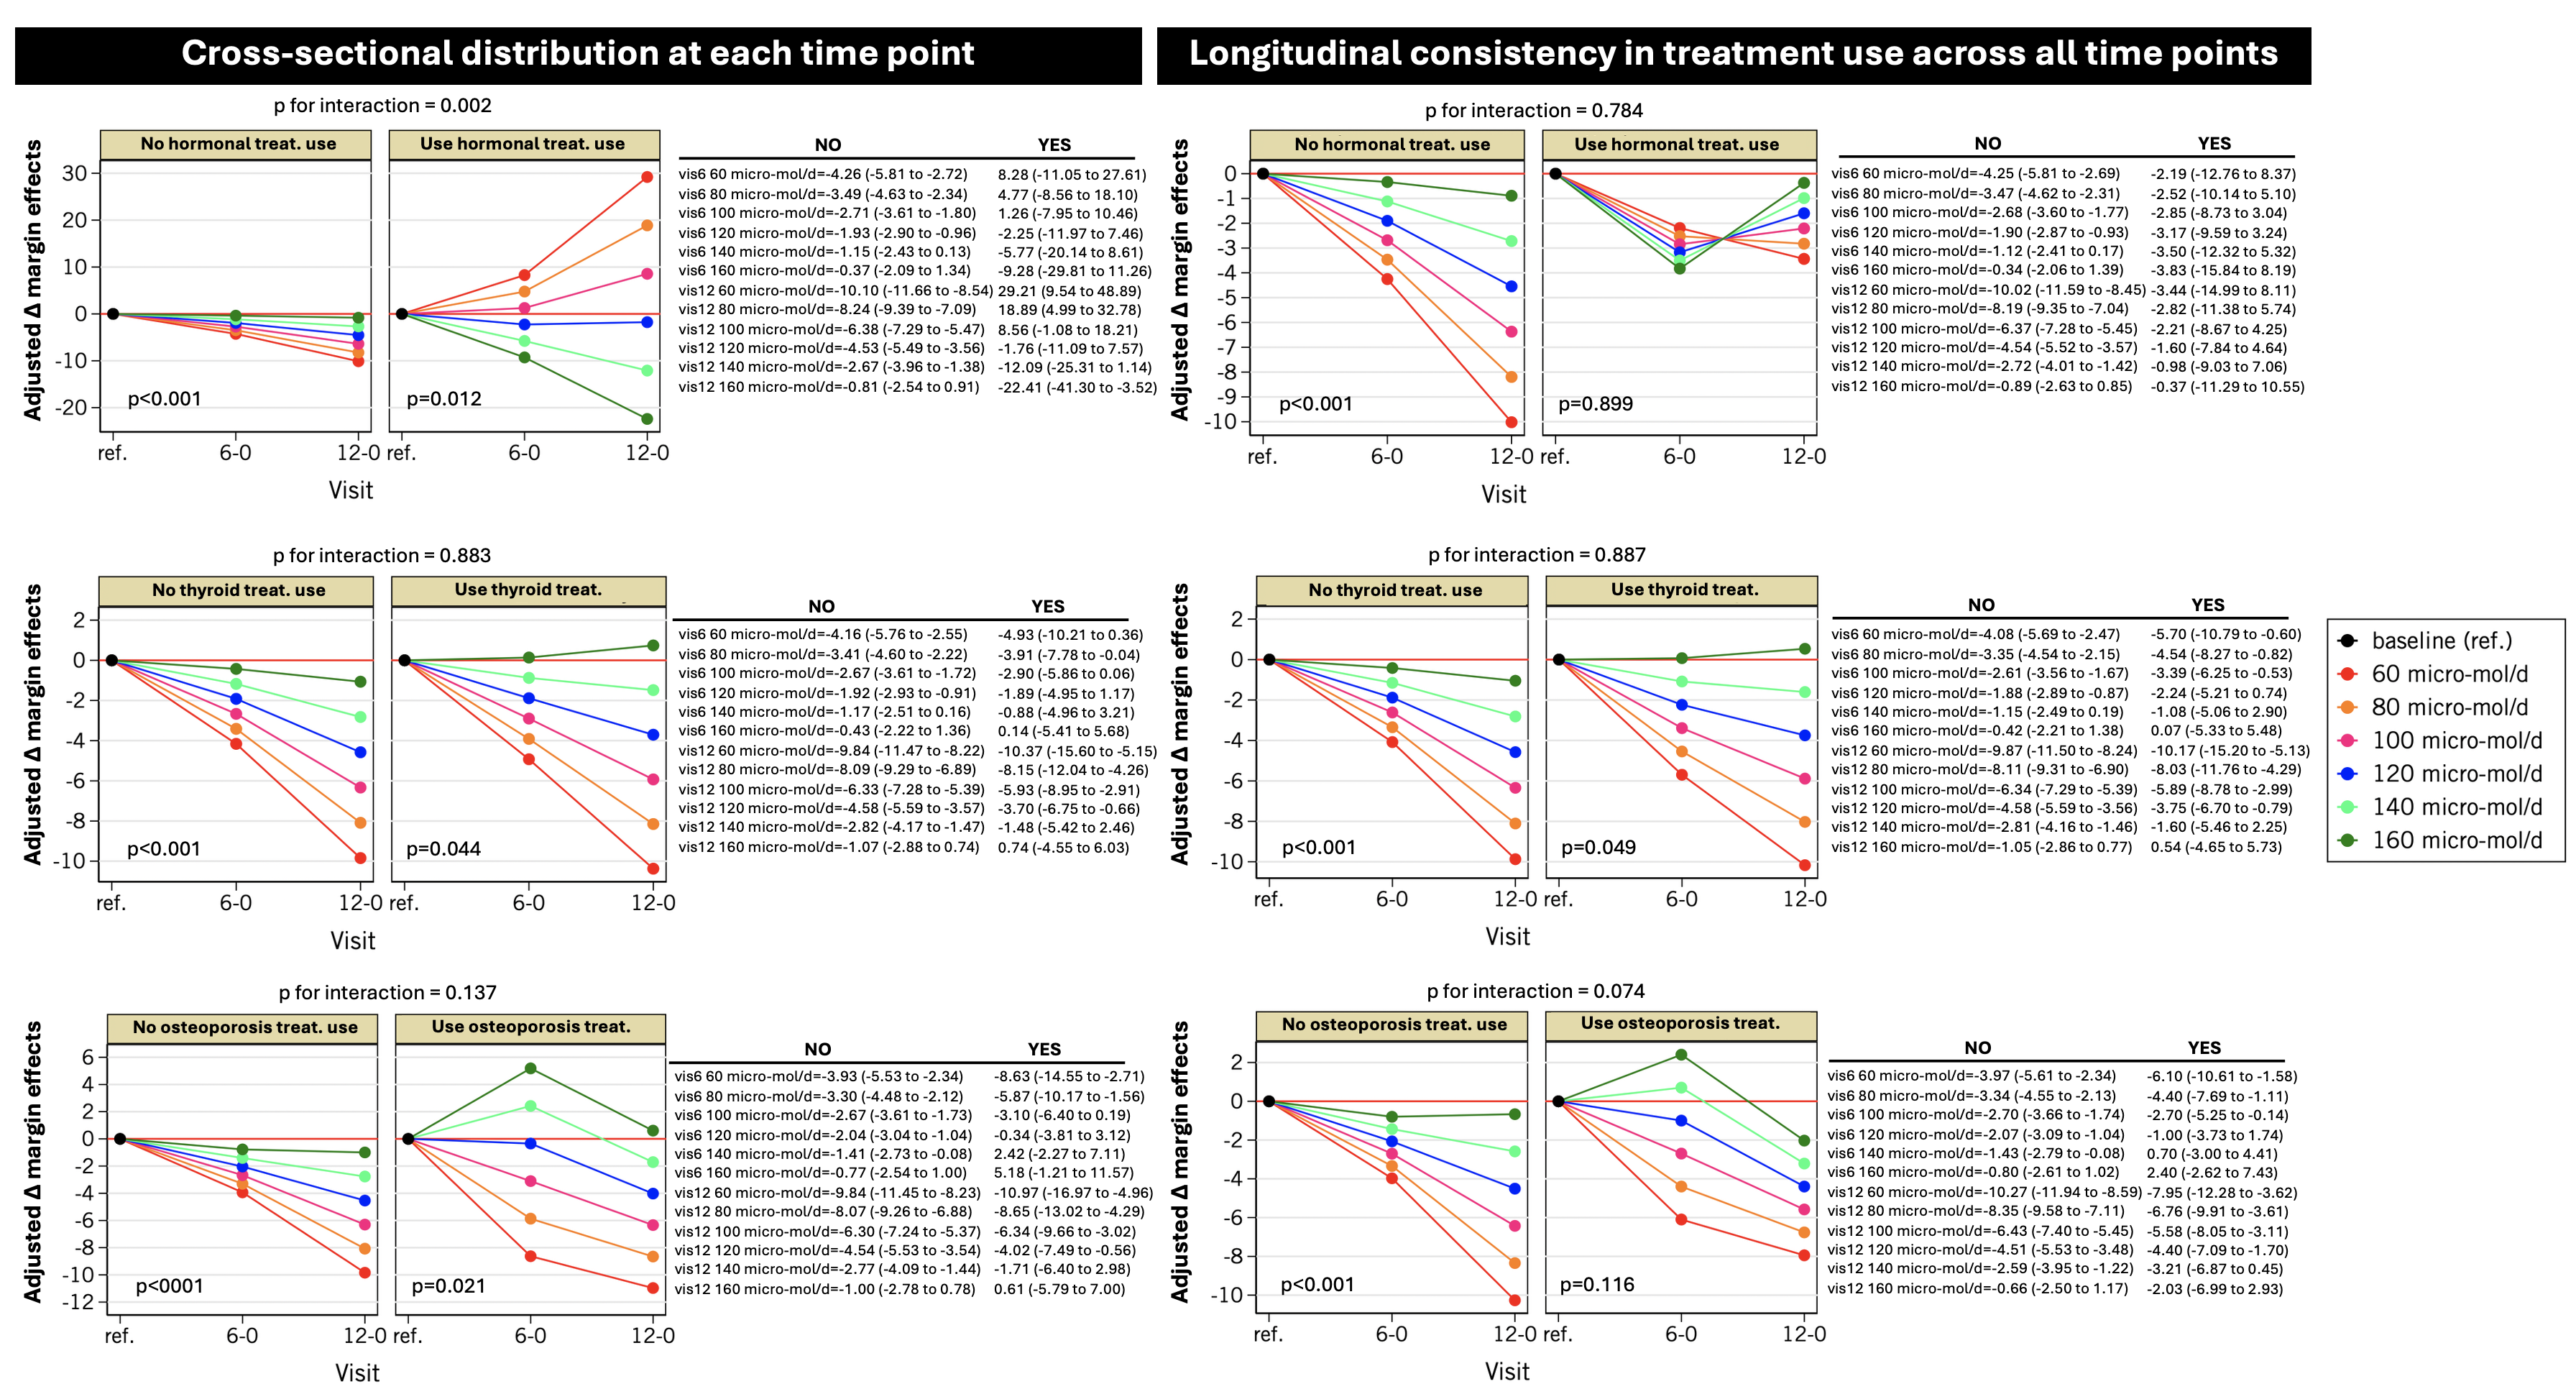


# **Supplemental figure 7. Stratified analysis effects of dietary SPD on calcium according to pharmacological treatment**


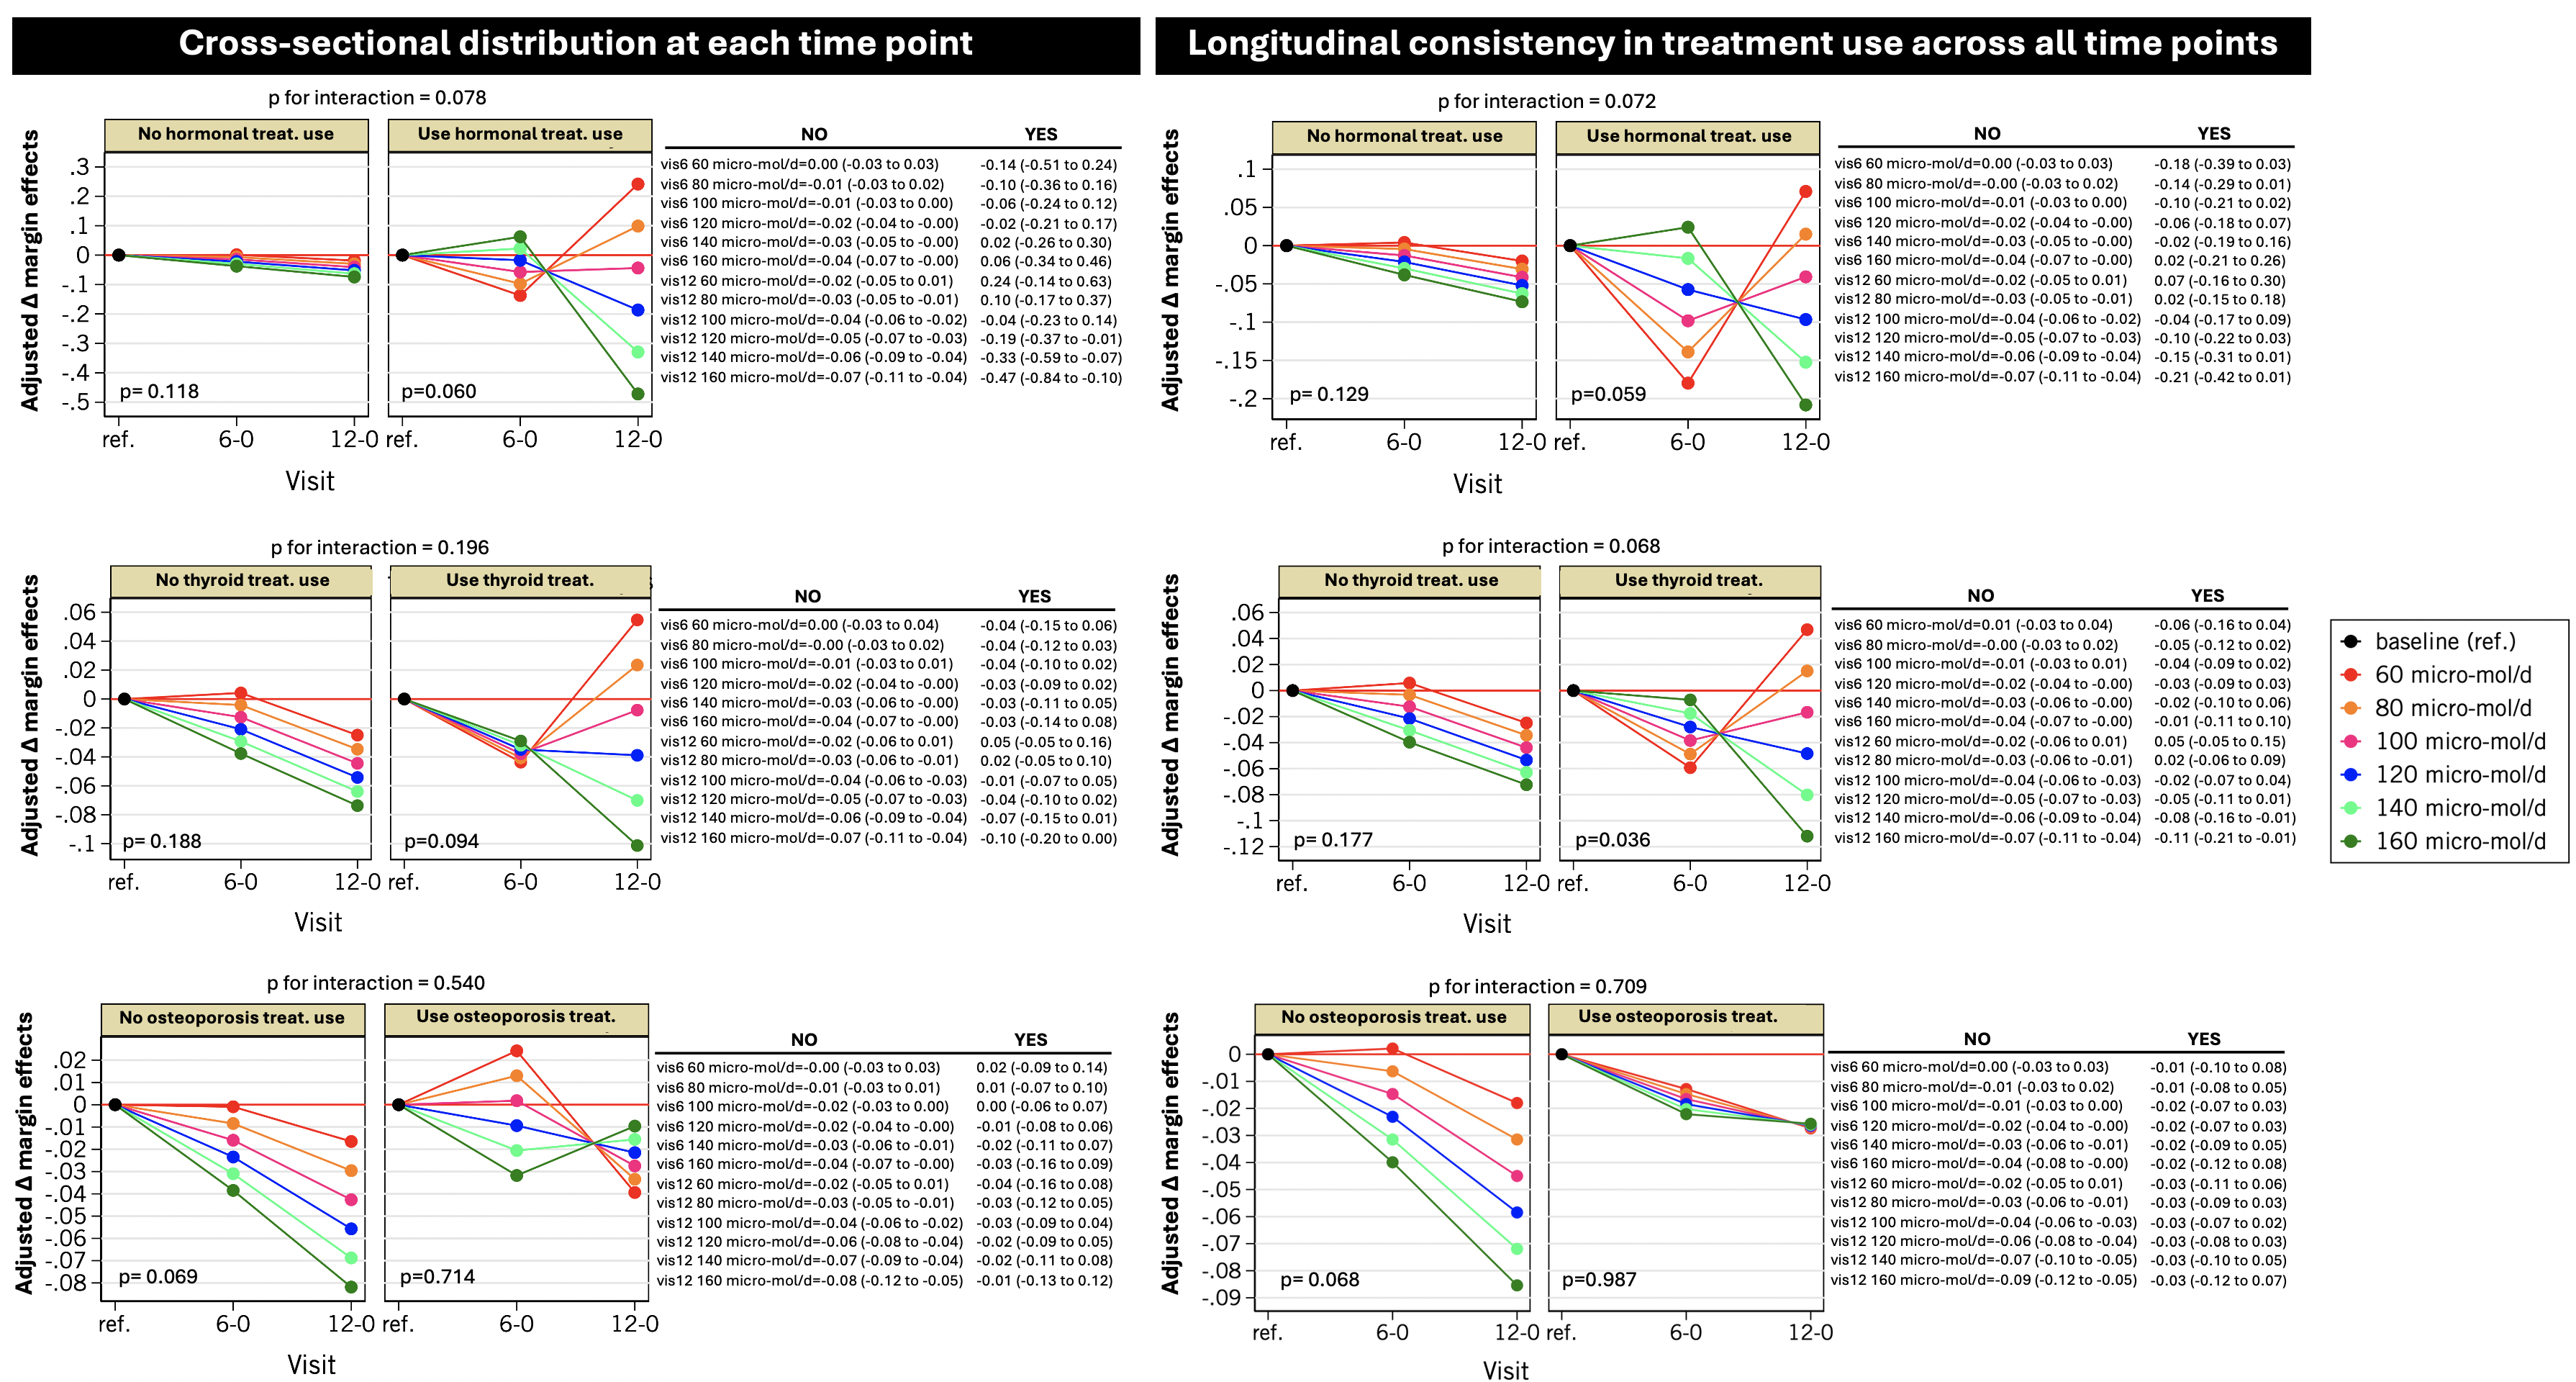

Supplement: Supplementary file 1 [file 0bd15c08b5f63779710e06df.docx]
